# Supplementary material for: Post-Hercynian ultrahigh-temperature tectono-metamorphic evolution of the Middle Atlas lower crust (central Morocco) revealed by metapelitic granulite xenoliths
Source: Copernicus journal article supplement (doi:10.5194/se-16-1-2025), 2025-01-03
Supplement: Supplementary file 2 [file se-16-1-2025-supplement.zip]

100  $\mu\text{m}$

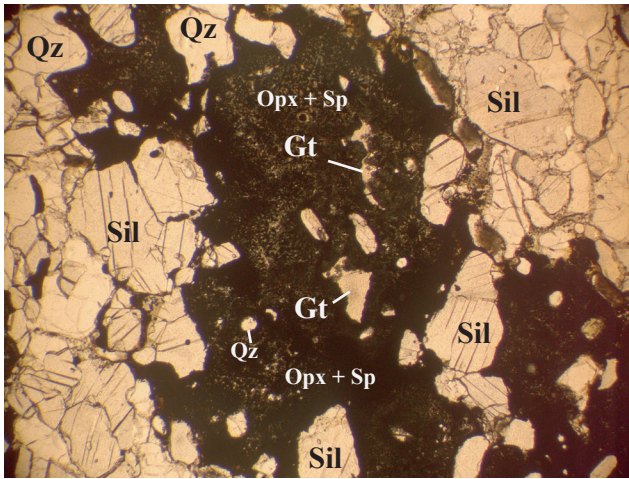

**Polarized light**

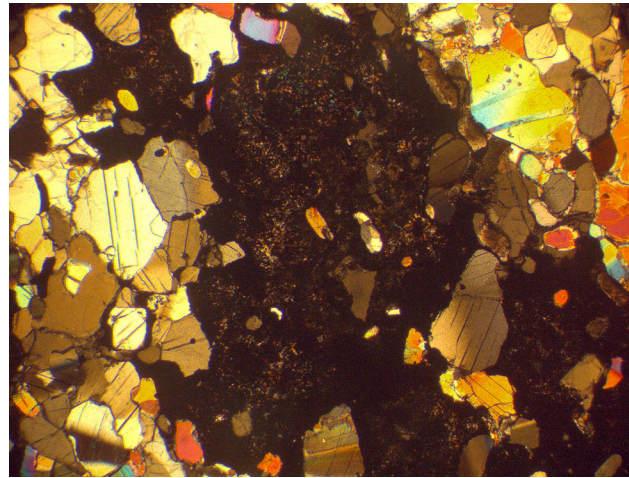

**Polarized - analyzed light  
Nicols partially crossed**

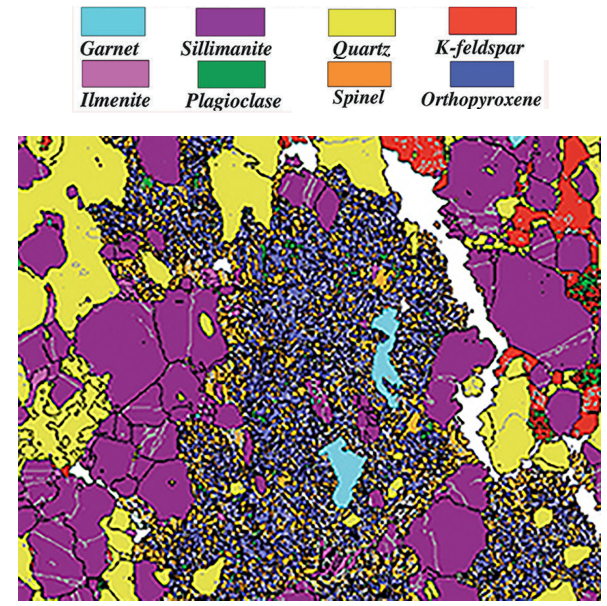

**Extract of the EBSD map  
for the same area**
