# Supplementary material for: Post-Hercynian ultrahigh-temperature tectono-metamorphic evolution of the Middle Atlas lower crust (central Morocco) revealed by metapelitic granulite xenoliths
Source: Copernicus journal article supplement (doi:10.5194/se-16-1-2025), 2025-01-03
Supplement: Supplementary file 5 [file se-16-1-2025-supplement.zip]

**Table S5 - Spinel**

|                                    | G2    |        |       |       |        |         |          | G4    |       | TAF500 |                 |
|------------------------------------|-------|--------|-------|-------|--------|---------|----------|-------|-------|--------|-----------------|
|                                    | 4     | 12     | 34    | 36    | 71     | average | $\sigma$ | 61    | 63    | 45     | $\frac{72}{EG}$ |
| SiO <sub>2</sub>                   | 0.27  | 0.08   | 0.24  | 0.30  | 0.12   | 0.20    | 0.10     | 0.56  | 2.01  | 0.24   | 0.18            |
| Al <sub>2</sub> O <sub>3</sub>     | 52.52 | 56.96  | 56.12 | 54.2  | 58.36  | 55.63   | 2.30     | 56.68 | 54.46 | 51.45  | 51.05           |
| Cr <sub>2</sub> O <sub>3</sub>     | 0     | 0      | 0.03  | 0.02  | 0.07   | 0.02    | 0.03     | 0.05  | 0.05  | 0.19   | 0.15            |
| TiO <sub>2</sub>                   | 2.05  | 0.05   | 0.39  | 0.93  | 0.08   | 0.70    | 0.83     | 0.41  | 0.35  | 1.78   | 1.74            |
| MgO                                | 6.69  | 7.56   | 8.15  | 7.29  | 7.39   | 7.42    | 0.53     | 7.16  | 6.87  | 8.75   | 8.09            |
| FeO <sup>T</sup>                   | 35.38 | 35.54  | 34.09 | 34.06 | 34.91  | 34.80   | 0.70     | 32.21 | 34.1  | 36.88  | 38.01           |
| MnO                                | 0.57  | 0.68   | 0.61  | 0.26  | 0.72   | 0.57    | 0.18     | 0.47  | 0.41  | 0.38   | 0.30            |
| ZnO                                | 0     | 0      | 0     | 0.10  | 0      | 0.02    | 0.05     | 0     | 0.13  | 0.09   | 0.00            |
| CaO                                | 0     | 0.01   | 0.03  | 0.03  | 0.03   | 0.02    | 0.01     | 0.03  | 0.08  | 0.01   | 0.01            |
| $\Sigma$                           | 97.48 | 100.88 | 99.66 | 97.19 | 101.68 | 99.378  | 2.00     | 97.57 | 98.41 | 99.77  | 99.53           |
| Si                                 | 0.01  | 0      | 0.01  | 0.01  | 0      | 0.01    | 0        | 0.02  | 0.06  | 0.01   | 0.01            |
| Al                                 | 1.81  | 1.90   | 1.87  | 1.86  | 1.91   | 1.87    | 0.04     | 1.91  | 1.83  | 1.75   | 1.75            |
| Fe <sup>3+ rec</sup>               | 0.10  | 0.14   | 0.13  | 0.11  | 0.11   | 0.12    | 0.02     | 0.06  | 0.05  | 0.21   | 0.20            |
| Cr                                 | 0     | 0      | 0     | 0     | 0      | 0       | 0        | 0     | 0     | 0      | 0               |
| Ti                                 | 0.05  | 0      | 0.01  | 0.02  | 0.00   | 0.02    | 0.02     | 0.01  | 0.01  | 0.04   | 0.04            |
| $\Sigma$                           | 2.01  | 2.05   | 2.05  | 2.03  | 2.07   | 2.04    | 0.03     | 2.07  | 2.04  | 2.00   | 2.00            |
| Fe <sup>2+ rec</sup>               | 0.77  | 0.70   | 0.68  | 0.72  | 0.70   | 0.71    | 0.03     | 0.71  | 0.76  | 0.68   | 0.71            |
| Mn                                 | 0.01  | 0      | 0.01  | 0.01  | 0.02   | 0.01    | 0        | 0.01  | 0     | 0.01   | 0.01            |
| Mg                                 | 0.29  | 0.32   | 0.34  | 0.31  | 0.31   | 0.31    | 0.02     | 0.31  | 0.29  | 0.38   | 0.35            |
| Zn                                 | 0     | 0      | 0     | 0.03  | 0      | 0       | 0        | 0     | 0     | 0      | 0               |
| Ca                                 | 0     | 0      | 0     | 0     | 0      | 0       | 0        | 0     | 0     | 0      | 0               |
| $\Sigma$                           | 1.07  | 1.02   | 1.03  | 1.07  | 1.03   | 1.04    | 0.02     | 1.02  | 1.05  | 1.07   | 1.07            |
| X <sub>FeT</sub>                   | 0.75  | 0.73   | 0.7   | 0.72  | 0.73   | 0.73    | 0.02     | 0.72  | 0.74  | 0.70   | 0.73            |
| X <sub>Fe2+ rec</sub>              | 0.88  | 0.84   | 0.84  | 0.87  | 0.86   | 0.86    | 0.02     | 0.93  | 0.94  | 0.77   | 0.77            |
| Fe <sup>3+</sup> /Fe <sup>2+</sup> | 12.99 | 20.00  | 19.12 | 15.28 | 15.71  | 16.62   | 2.89     | 7.35  | 6.26  | 23.30  | 22.94           |

|                                    | TAF501   |          |          |          |          |          |          |          |          |          |          | average | $\sigma$ |
|------------------------------------|----------|----------|----------|----------|----------|----------|----------|----------|----------|----------|----------|---------|----------|
|                                    | 14<br>EG | 15<br>EG | 10<br>NS | 11<br>NS | 12<br>NG | 13<br>NG | 14<br>AS | 15<br>AS | 24<br>AS | 36<br>AS | 37<br>AS |         |          |
| SiO <sub>2</sub>                   | 0.20     | 0.18     | 0.01     | 0.03     | 0.12     | 0.16     | 0.06     | 0.06     | 0.17     | 0.04     | 0.05     | 0.08    | 0.06     |
| Al <sub>2</sub> O <sub>3</sub>     | 56.60    | 61.75    | 53.59    | 54.79    | 56.60    | 57.09    | 60.90    | 59.98    | 57.21    | 56.27    | 56.92    | 57.04   | 2.27     |
| Cr <sub>2</sub> O <sub>3</sub>     | 0.27     | 0.08     | 0.00     | 0.00     | 0.00     | 0.00     | 0.00     | 0.00     | 0.20     | 0.00     | 0.00     | 0.02    | 0.07     |
| TiO <sub>2</sub>                   | 0.52     | 0.10     | 0.55     | 0.66     | 0.00     | 0.04     | 0.11     | 0.27     | 0.73     | 0.44     | 0.38     | 0.29    | 0.23     |
| MgO                                | 11.49    | 9.35     | 8.15     | 8.28     | 7.59     | 7.61     | 11.30    | 9.39     | 11.1     | 10.04    | 9.87     | 9.26    | 1.4      |
| FeO <sup>T</sup>                   | 30.07    | 28.94    | 35.91    | 34.77    | 35.19    | 34.99    | 26.47    | 28.94    | 30.02    | 31.33    | 31.09    | 32.08   | 3.30     |
| MnO                                | 0.26     | 0.41     | 0.08     | 0.09     | 0.33     | 0.34     | 0.22     | 0.28     | 0.29     | 0.11     | 0.07     | 0.20    | 0.11     |
| ZnO                                | 0.14     | 0.18     | 0.89     | 0.83     | 0.10     | 0.18     | 0.06     | 0.15     | 0.11     | 0.34     | 0.36     | 0.34    | 0.32     |
| CaO                                | 0.05     | 0.03     | 0.01     | 0.03     | 0.02     | 0.00     | 0.01     | 0.07     | 0.01     | 0.03     | 0.03     | 0.03    | 0.00     |
| $\Sigma$                           | 99.09    | 101.02   | 99.19    | 99.48    | 99.95    | 100.41   | 99.13    | 99.14    | 99.84    | 98.60    | 98.74    | 99.34   | 0.57     |
| Si                                 | 0.01     | 0.01     | 0.00     | 0.00     | 0.00     | 0.00     | 0.00     | 0.00     | 0.01     | 0.00     | 0.00     | 0.00    | 0.00     |
| Al                                 | 1.86     | 1.96     | 1.82     | 1.84     | 1.89     | 1.89     | 1.95     | 1.95     | 1.87     | 1.87     | 1.88     | 1.88    | 0.04     |
| Fe <sup>3+ rec</sup>               | 0.16     | 0.04     | 0.20     | 0.17     | 0.14     | 0.13     | 0.06     | 0.05     | 0.14     | 0.14     | 0.13     | 0.13    | 0.05     |
| Cr                                 | 0.01     | 0.00     | 0.00     | 0.00     | 0.00     | 0.00     | 0.00     | 0.00     | 0.01     | 0.00     | 0.00     | 0.00    | 0.00     |
| Ti                                 | 0.01     | 0.00     | 0.01     | 0.01     | 0.00     | 0.00     | 0.00     | 0.01     | 0.00     | 0.01     | 0.01     | 0.01    | 0.05     |
| $\Sigma$                           | 2.03     | 2.01     | 1.99     | 2.06     | 2.05     | 1.94     | 2.04     | 2.17     | 2.03     | 2.02     | 2.10     | 2.05    | 0.07     |
| Fe <sup>2+ rec</sup>               | 0.54     | 0.62     | 0.66     | 0.66     | 0.69     | 0.69     | 0.54     | 0.62     | 0.55     | 0.59     | 0.60     | 0.62    | 0.06     |
| Mn                                 | 0.01     | 0.01     | 0.00     | 0.00     | 0.01     | 0.01     | 0.01     | 0.01     | 0.01     | 0.00     | 0.00     | 0.01    | 0.00     |
| Mg                                 | 0.48     | 0.38     | 0.35     | 0.35     | 0.32     | 0.32     | 0.46     | 0.39     | 0.46     | 0.42     | 0.41     | 0.39    | 0.06     |
| Zn                                 | 0.01     | 0.01     | 0.03     | 0.03     | 0.00     | 0.01     | 0.00     | 0.01     | 0.00     | 0.01     | 0.01     | 0.01    | 0.01     |
| Ca                                 | 0.00     | 0.00     | 0.00     | 0.00     | 0.00     | 0.00     | 0.00     | 0.00     | 0.00     | 0.00     | 0.00     | 0.00    | 0.00     |
| $\Sigma$                           | 1.03     | 1.01     | 1.04     | 1.04     | 1.02     | 1.02     | 1.01     | 1.02     | 1.02     | 1.03     | 1.03     | 1.03    | 0.01     |
| X <sub>FeT</sub>                   | 0.60     | 0.64     | 0.71     | 0.70     | 0.72     | 0.72     | 0.57     | 0.63     | 0.60     | 0.64     | 0.64     | 0.66    | 0.06     |
| X <sub>Fe2+ rec</sub>              | 0.77     | 0.95     | 0.76     | 0.79     | 0.83     | 0.84     | 0.91     | 0.92     | 0.79     | 0.80     | 0.82     | 0.83    | 0.05     |
| Fe <sup>3+</sup> /Fe <sup>2+</sup> | 22.86    | 5.42     | 23.67    | 20.66    | 16.97    | 16.04    | 9.40     | 7.72     | 20.63    | 19.58    | 17.81    | 16.94   | 5.28     |
