# Supplementary material for: Post-Hercynian ultrahigh-temperature tectono-metamorphic evolution of the Middle Atlas lower crust (central Morocco) revealed by metapelitic granulite xenoliths
Source: Copernicus journal article supplement (doi:10.5194/se-16-1-2025), 2025-01-03
Supplement: Supplementary file 6 [file se-16-1-2025-supplement.zip]

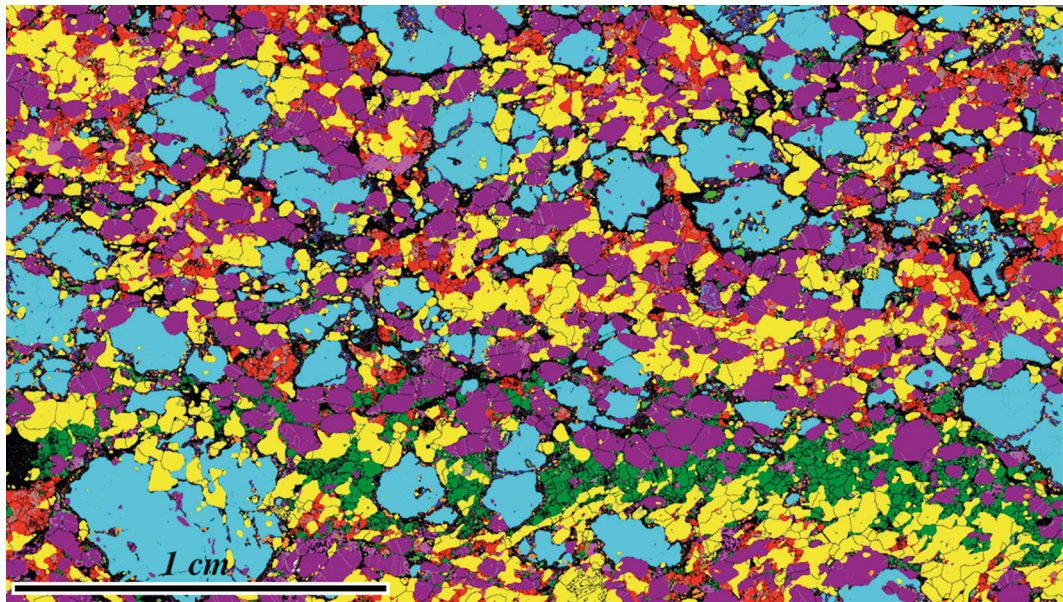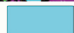

*Garnet*

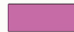

*Ilmenite*

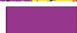

*Sillimanite*

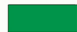

*Plagioclase*

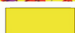

*Quartz*

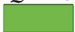

*Ti-Magnetite*

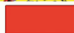

*K-feldspar*

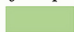

*Corundum*

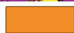

*Spinel*

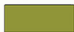

*Rutile*

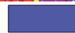

*Orthopyroxene*

**G4**
