# Supplementary material for: Post-Hercynian ultrahigh-temperature tectono-metamorphic evolution of the Middle Atlas lower crust (central Morocco) revealed by metapelitic granulite xenoliths
Source: Copernicus journal article supplement (doi:10.5194/se-16-1-2025), 2025-01-03
Supplement: Supplementary file 8 [file se-16-1-2025-supplement.zip]

**Table S9 - Feldspars**

| wt%                            | G2                    |       |       |       |            |            |        |         |          |
|--------------------------------|-----------------------|-------|-------|-------|------------|------------|--------|---------|----------|
|                                | K-feldspars in matrix |       |       |       |            |            |        |         |          |
|                                | 26                    | 27    | 28    | 29    | 63 kfp (c) | 63 kfp (r) | 65 kfp | average | $\sigma$ |
| SiO <sub>2</sub>               | 64.32                 | 64.26 | 64.15 | 63.92 | 64.00      | 63.86      | 64.22  | 64.10   | 0.19     |
| Al <sub>2</sub> O <sub>3</sub> | 19.13                 | 18.93 | 19.06 | 18.78 | 19.47      | 19.36      | 19.44  | 19.17   | 0.27     |
| FeO                            | 0.07                  | 0.03  | 0.01  | 0.07  | 0.08       | 0.06       | 0.03   | 0.05    | 0.03     |
| CaO                            | 0.44                  | 0.38  | 0.37  | 0.41  | 0.32       | 0.33       | 0.35   | 0.37    | 0.04     |
| Na <sub>2</sub> O              | 2.43                  | 2.69  | 2.56  | 2.54  | 1.92       | 2.20       | 2.69   | 2.43    | 0.28     |
| K <sub>2</sub> O               | 13.66                 | 13.48 | 13.57 | 13.63 | 14.72      | 14.58      | 13.72  | 13.91   | 0.51     |
| $\Sigma$                       | 100.05                | 99.77 | 99.72 | 99.35 | 100.51     | 100.39     | 100.45 | 100.03  | 0.44     |
| Si                             | 2.96                  | 2.96  | 2.96  | 2.96  | 2.94       | 2.94       | 2.94   | 2.95    | 0.01     |
| Al                             | 1.04                  | 1.03  | 1.04  | 1.03  | 1.06       | 1.05       | 1.05   | 1.04    | 0.01     |
| $\Sigma$                       | 3.99                  | 3.99  | 3.99  | 3.99  | 4.00       | 3.99       | 3.99   | 3.99    | 0.01     |
| Fe                             | 0                     | 0     | 0     | 0     | 0          | 0          | 0      |         |          |
| Ca                             | 0.02                  | 0.02  | 0.02  | 0.02  | 0.02       | 0.02       | 0.02   | 0.02    | 0        |
| Na                             | 0.22                  | 0.24  | 0.23  | 0.23  | 0.17       | 0.20       | 0.24   | 0.22    | 0.03     |
| K                              | 0.80                  | 0.79  | 0.80  | 0.81  | 0.86       | 0.86       | 0.80   | 0.82    | 0.03     |
| $\Sigma$                       | 1.04                  | 1.05  | 1.05  | 1.06  | 1.05       | 1.07       | 1.06   | 1.05    | 0.01     |
| X <sub>ab</sub>                | 0.21                  | 0.23  | 0.22  | 0.22  | 0.16       | 0.18       | 0.23   | 0.20    | 0.03     |
| X <sub>an</sub>                | 0.02                  | 0.02  | 0.02  | 0.02  | 0.02       | 0.02       | 0.02   | 0.02    | 0        |
| X <sub>or</sub>                | 0.77                  | 0.75  | 0.76  | 0.76  | 0.82       | 0.80       | 0.76   | 0.78    | 3.00     |

  

| wt%                            | G2                     |         |        |          |        |        |        |         |          |
|--------------------------------|------------------------|---------|--------|----------|--------|--------|--------|---------|----------|
|                                | Plagioclases in matrix |         |        |          |        |        |        |         |          |
|                                | 70                     | 38 core | 38 rim | 40 small | 40 sak | 41 sak | 42 sak | average | $\sigma$ |
| SiO <sub>2</sub>               | 57.55                  | 59.33   | 58.74  | 58.92    | 58.73  | 59.01  | 58.70  | 58.71   | 0.56     |
| Al <sub>2</sub> O <sub>3</sub> | 25.66                  | 25.58   | 25.13  | 25.28    | 25.51  | 25.56  | 25.4   | 25.45   | 0.19     |
| FeO                            | 0.15                   | 0.12    | 0.19   | 0.11     | 0.19   | 0.15   | 0.19   | 0.16    | 0.03     |
| CaO                            | 6.97                   | 7.48    | 7.30   | 7.25     | 8.22   | 8.13   | 8.51   | 7.69    | 0.59     |
| Na <sub>2</sub> O              | 6.33                   | 6.42    | 4.12   | 5.43     | 5.46   | 5.83   | 5.35   | 5.56    | 0.77     |
| K <sub>2</sub> O               | 1.44                   | 1.41    | 4.61   | 2.90     | 1.51   | 1.15   | 1.80   | 2.12    | 1.24     |
| $\Sigma$                       | 98.10                  | 100.34  | 100.09 | 99.89    | 99.62  | 99.83  | 99.95  | 99.69   | 0.74     |
| Si                             | 2.63                   | 2.65    | 2.66   | 2.66     | 2.64   | 2.65   | 2.64   | 2.65    | 0.01     |
| Al                             | 1.38                   | 1.35    | 1.34   | 1.34     | 1.35   | 1.35   | 1.35   | 1.35    | 0.01     |
| $\Sigma$                       | 4.01                   | 4.00    | 4.00   | 4.00     | 4.00   | 4.00   | 4.00   | 4.00    | 0        |
| Fe                             | 0.01                   | 0       | 0.01   | 0        | 0.01   | 0.01   | 0.01   |         |          |
| Ca                             | 0.34                   | 0.36    | 0.35   | 0.35     | 0.40   | 0.39   | 0.41   | 0.37    | 0.03     |
| Na                             | 0.56                   | 0.56    | 0.36   | 0.48     | 0.48   | 0.51   | 0.47   | 0.49    | 0.07     |
| K                              | 0.08                   | 0.08    | 0.27   | 0.17     | 0.09   | 0.07   | 0.10   | 0.12    | 0.07     |
| $\Sigma$                       | 0.99                   | 1.00    | 0.99   | 1.00     | 0.97   | 0.97   | 0.99   | 0.99    | 0.01     |
| X <sub>ab</sub>                | 0.57                   | 0.56    | 0.37   | 0.48     | 0.50   | 0.53   | 0.48   | 0.50    | 0.07     |
| X <sub>an</sub>                | 0.35                   | 0.36    | 0.36   | 0.35     | 0.41   | 0.41   | 0.42   | 0.38    | 0.03     |
| X <sub>or</sub>                | 0.09                   | 0.08    | 0.27   | 0.17     | 0.09   | 0.07   | 0.11   | 0.13    | 0.07     |

| wt%                            | K-feldspars included in garnet |       |       |       |         |          | Plagioclases included in garnet |       |        |        |       |       |       |         |          |
|--------------------------------|--------------------------------|-------|-------|-------|---------|----------|---------------------------------|-------|--------|--------|-------|-------|-------|---------|----------|
|                                | 10                             | 11    | 14    | 21    | average | $\sigma$ | 8                               | 9     | 10     | 12     | 17    | 18    | 20    | average | $\sigma$ |
| SiO <sub>2</sub>               | 64.09                          | 62.90 | 62.77 | 64.46 | 63.56   | 0.85     | 59.01                           | 59.4  | 60.20  | 60.00  | 60.00 | 60.00 | 60.00 | 59.80   | 0.43     |
| Al <sub>2</sub> O <sub>3</sub> | 18.34                          | 18.24 | 18.18 | 18.26 | 18.25   | 0.07     | 23.48                           | 23.93 | 25.38  | 25.61  | 24.73 | 24.19 | 24.06 | 24.48   | 0.79     |
| FeO                            | 0.05                           | 0.04  | 0.11  | 0.11  | 0.08    | 0.04     | 0.77                            | 0.1   | 0.08   | 0.1    | 0.13  | 0.13  | 0.13  | 0.21    | 0.25     |
| CaO                            | 0.37                           | 0.36  | 0.33  | 0.38  | 0.36    | 0.02     | 6.94                            | 7.15  | 6.83   | 6.87   | 7.63  | 7.20  | 7.15  | 7.11    | 0.27     |
| Na <sub>2</sub> O              | 2.53                           | 2.52  | 2.55  | 2.41  | 2.50    | 0.06     | 6.35                            | 6.63  | 7.22   | 7.09   | 6.65  | 6.48  | 6.64  | 6.72    | 0.32     |
| K <sub>2</sub> O               | 13.58                          | 13.67 | 13.83 | 13.79 | 13.72   | 0.11     | 1.91                            | 1.87  | 1.2    | 1.23   | 1.14  | 1.55  | 1.71  | 1.52    | 0.33     |
| $\Sigma$                       | 98.96                          | 97.73 | 97.77 | 99.40 | 98.47   | 0.85     | 98.46                           | 99.08 | 100.91 | 100.99 | 99.28 | 99.20 | 99.55 | 99.64   | 0.96     |
| Si                             | 2.98                           | 2.97  | 2.96  | 2.98  | 2.97    | 0.01     | 2.70                            | 2.69  | 2.67   | 2.66   | 2.66  | 2.69  | 2.70  | 2.68    | 0.02     |
| Al                             | 1.00                           | 1.01  | 1.01  | 1.00  | 1.01    | 0.01     | 1.27                            | 1.28  | 1.33   | 1.34   | 1.32  | 1.29  | 1.28  | 1.30    | 0.03     |
| $\Sigma$                       | 3.98                           | 3.98  | 3.98  | 3.98  | 3.98    | 0        | 3.96                            | 3.97  | 4.00   | 4.00   | 3.98  | 3.98  | 3.98  | 3.98    | 0.01     |
| Fe                             | 0                              | 0     | 0     | 0     |         |          | 0.03                            | 0     | 0      | 0      | 0.01  | 0.01  | 0.01  | 0.01    | 0.01     |
| Ca                             | 0.02                           | 0.02  | 0.02  | 0.019 | 0.02    | 0        | 0.34                            | 0.35  | 0.33   | 0.33   | 0.37  | 0.35  | 0.35  | 0.35    | 0.01     |
| Na                             | 0.23                           | 0.23  | 0.23  | 0.22  | 0.23    | 0.01     | 0.56                            | 0.58  | 0.62   | 0.61   | 0.58  | 0.57  | 0.58  | 0.59    | 0.02     |
| K                              | 0.81                           | 0.82  | 0.83  | 0.81  | 0.82    | 0.01     | 0.11                            | 0.11  | 0.07   | 0.07   | 0.07  | 0.09  | 0.10  | 0.09    | 0.02     |
| $\Sigma$                       | 1.05                           | 1.07  | 1.09  | 1.05  | 1.07    | 0.02     | 1.04                            | 1.04  | 1.02   | 1.01   | 1.02  | 1.01  | 1.03  | 1.02    | 0.01     |
| X <sub>ab</sub>                | 0.21                           | 0.22  | 0.22  | 0.21  | 0.21    | 0.01     | 0.56                            | 0.56  | 0.61   | 0.61   | 0.57  | 0.57  | 0.57  | 0.58    | 0.02     |
| X <sub>an</sub>                | 0.02                           | 0.02  | 0.02  | 0.02  | 0.02    | 0        | 0.34                            | 0.34  | 0.32   | 0.33   | 0.36  | 0.35  | 0.34  | 0.34    | 0.01     |
| X <sub>or</sub>                | 0.77                           | 0.77  | 0.77  | 0.78  | 0.77    | 0        | 0.11                            | 0.10  | 0.07   | 0.07   | 0.07  | 0.09  | 0.10  | 0.09    | 0.02     |

| wt%                            | K-feldspars s in matrix |        |        |         |          | Plagioclase in matrix |        |        |         |          |
|--------------------------------|-------------------------|--------|--------|---------|----------|-----------------------|--------|--------|---------|----------|
|                                | 43                      | 45     | 38     | average | $\sigma$ | 37                    | 40     | 44     | average | $\delta$ |
| SiO <sub>2</sub>               | 63.6                    | 64.34  | 64.6   | 64.18   | 0.52     | 59.99                 | 60.28  | 60.09  | 60.12   | 0.15     |
| Al <sub>2</sub> O <sub>3</sub> | 19.38                   | 19.5   | 19.2   | 19.36   | 0.15     | 25.01                 | 24.95  | 25.61  | 25.19   | 0.36     |
| FeO                            | 0.06                    | 0.07   | 0.01   | 0.05    | 0.03     | 0.09                  | 0.08   | 0.10   | 0.09    | 0.01     |
| CaO                            | 0.38                    | 0.31   | 0.33   | 0.34    | 0.04     | 6.73                  | 6.76   | 6.87   | 6.79    | 0.07     |
| Na <sub>2</sub> O              | 2.57                    | 2.56   | 2.78   | 2.64    | 0.12     | 7.19                  | 7.04   | 7.09   | 7.11    | 0.08     |
| K <sub>2</sub> O               | 13.7                    | 14.1   | 13.29  | 13.70   | 0.40     | 1.23                  | 1.1    | 1.23   | 1.19    | 0.08     |
| $\Sigma$                       | 99.69                   | 100.88 | 100.21 | 100.26  | 0.60     | 100.24                | 100.21 | 100.99 | 100.48  | 0.44     |
| Si                             | 2.94                    | 2.94   | 2.96   | 2.95    | 0.01     | 2.68                  | 2.69   | 2.66   | 2.68    | 0.02     |
| Al                             | 1.06                    | 1.05   | 1.04   | 1.05    | 0.01     | 1.32                  | 1.31   | 1.34   | 1.32    | 0.02     |
| $\Sigma$                       | 3.99                    | 3.99   | 4.00   | 3.99    | 0.01     | 3.99                  | 4.00   | 4.00   | 4       | 0.01     |
| Fe                             | 0                       | 0      | 0      |         |          | 0                     | 0      | 0      |         |          |
| Ca                             | 0.02                    | 0.02   | 0.02   | 0.02    |          | 0.32                  | 0.32   | 0.33   | 0.32    | 0.01     |
| Na                             | 0.23                    | 0.23   | 0.25   | 0.24    | 0.01     | 0.62                  | 0.61   | 0.61   | 0.61    | 0.01     |
| K                              | 0.81                    | 0.82   | 0.78   | 0.80    | 0.02     | 0.07                  | 0.06   | 0.07   | 0.07    | 0.01     |
| $\Sigma$                       | 1.06                    | 1.07   | 1.04   | 1.06    | 0.01     | 1.02                  | 1.00   | 1.01   | 1.01    | 0.01     |
| X <sub>ab</sub>                | 0.22                    | 0.21   | 0.24   | 0.22    | 0.01     | 0.61                  | 0.61   | 0.61   | 0.61    | 0        |
| X <sub>an</sub>                | 0.02                    | 0.01   | 0.02   | 0.02    | 0.01     | 0.32                  | 0.33   | 0.33   | 0.33    | 0.01     |
| X <sub>or</sub>                | 0.76                    | 0.77   | 0.75   | 0.76    | 0.01     | 0.07                  | 0.06   | 0.07   | 0.07    | 0.01     |

| G4                             |                       |        |        |        |        |       |         |          |                        |       |
|--------------------------------|-----------------------|--------|--------|--------|--------|-------|---------|----------|------------------------|-------|
| wt%                            | K-feldspars in matrix |        |        |        |        |       |         |          | Plagioclases in matrix |       |
|                                | 1                     | 3      | 4      | 5      | 72     | 60    | average | $\sigma$ | 45                     | 46    |
| SiO <sub>2</sub>               | 64.71                 | 65.23  | 65.00  | 65.46  | 64.7   | 62.77 | 64.65   | 0.96     | 61.61                  | 61.98 |
| Al <sub>2</sub> O <sub>3</sub> | 19.22                 | 19.12  | 19.00  | 19.12  | 19.01  | 19.22 | 19.11   | 0.10     | 23.07                  | 22.90 |
| FeO                            | 0.05                  | 0.04   | 0.02   | 0.04   | 0.05   | 0.07  | 0.05    | 0.02     | 0.07                   | 0.13  |
| CaO                            | 0.33                  | 0.35   | 0.34   | 0.32   | 0.31   | 0.31  | 0.33    | 0.02     | 3.84                   | 3.44  |
| Na <sub>2</sub> O              | 2.73                  | 2.75   | 2.57   | 2.71   | 2.98   | 2.99  | 2.79    | 0.17     | 8.62                   | 8.64  |
| K <sub>2</sub> O               | 13.18                 | 13.28  | 13.66  | 13.27  | 13.29  | 12.57 | 13.21   | 0.35     | 0.77                   | 0.82  |
| $\Sigma$                       | 100.22                | 100.77 | 100.59 | 100.92 | 100.34 | 97.93 | 100.13  | 1.11     | 97.98                  | 97.90 |
| Si                             | 2.96                  | 2.97   | 2.97   | 2.97   | 2.96   | 2.94  | 2.96    | 0.01     | 2.78                   | 2.80  |
| Al                             | 1.04                  | 1.03   | 1.02   | 1.02   | 1.03   | 1.06  | 1.03    | 0.02     | 1.23                   | 1.22  |
| $\Sigma$                       | 4.00                  | 4.00   | 4.00   | 4.00   | 3.99   | 4.00  | 3.99    | 0.01     | 4.01                   | 4.02  |
| Fe                             | 0                     | 0      | 0      | 0      | 0      | 0     |         |          |                        |       |
| Ca                             | 0.02                  | 0.02   | 0.02   | 0.02   | 0.02   | 0.02  | 0.02    | 0        | 0.19                   | 0.17  |
| Na                             | 0.24                  | 0.24   | 0.23   | 0.24   | 0.27   | 0.27  | 0.25    | 0.02     | 0.76                   | 0.76  |
| K                              | 0.77                  | 0.77   | 0.80   | 0.77   | 0.78   | 0.75  | 0.77    | 0.01     | 0.05                   | 0.05  |
| $\Sigma$                       | 1.03                  | 1.03   | 1.04   | 1.02   | 1.06   | 1.04  | 1.04    | 0.01     | 0.99                   | 0.98  |
| X <sub>ab</sub>                | 0.24                  | 0.24   | 0.22   | 0.23   | 0.25   | 0.26  | 0.24    | 0.01     | 0.77                   | 0.78  |
| X <sub>an</sub>                | 0.02                  | 0.02   | 0.02   | 0.02   | 0.01   | 0.02  | 0.02    | 0        | 0.19                   | 0.17  |
| X <sub>or</sub>                | 0.75                  | 0.75   | 0.77   | 0.75   | 0.74   | 0.72  | 0.75    | 0.01     | 0.05                   | 0.05  |

| TAF501                         |                        |        |        |        |        |         |          |
|--------------------------------|------------------------|--------|--------|--------|--------|---------|----------|
| wt%                            | Plagioclases in matrix |        |        |        |        |         |          |
|                                | 14                     | 79     | 80     | 79     | 80     | average | $\sigma$ |
| SiO <sub>2</sub>               | 60.37                  | 57.91  | 59.92  | 57.91  | 59.92  | 59.21   | 1.20     |
| Al <sub>2</sub> O <sub>3</sub> | 23.83                  | 26.65  | 25.42  | 26.65  | 25.42  | 25.59   | 1.16     |
| FeO                            | 0.10                   | 0.1    | 0.19   | 0.10   | 0.19   | 0.14    | 0.05     |
| CaO                            | 4.58                   | 8.21   | 6.97   | 8.21   | 6.97   | 7.00    | 1.48     |
| Na <sub>2</sub> O              | 8.44                   | 6.72   | 7.07   | 6.72   | 7.07   | 7.20    | 0.71     |
| K <sub>2</sub> O               | 0.70                   | 0.42   | 0.69   | 0.42   | 0.69   | 0.58    | 0.15     |
| $\Sigma$                       | 98.01                  | 100.01 | 100.26 | 100.01 | 100.26 | 99.71   | 0.96     |
| Si                             | 2.74                   | 2.59   | 2.67   | 2.59   | 2.67   | 2.65    | 0.06     |
| Al                             | 1.27                   | 1.41   | 1.33   | 1.10   | 1.33   | 1.35    | 0.06     |
| $\Sigma$                       | 4.01                   | 4.00   | 4.00   | 4.00   | 4.00   | 4.00    | 0        |
| Fe                             | 0                      | 0      | 0.01   | 0      | 0.01   | 0.01    | 0        |
| Ca                             | 0.22                   | 0.39   | 0.33   | 0.39   | 0.33   | 0.34    | 0.07     |
| Na                             | 0.74                   | 0.58   | 0.61   | 0.58   | 0.62   | 0.63    | 0.07     |
| K                              | 0.04                   | 0.02   | 0.04   | 0.02   | 0.04   | 0.03    | 0.01     |
| $\Sigma$                       | 1.01                   | 1.01   | 1.00   | 1.01   | 0.99   | 1.00    | 0.01     |
| X <sub>ab</sub>                | 0.74                   | 0.58   | 0.62   | 0.58   | 0.62   | 0.63    | 0.06     |
| X <sub>an</sub>                | 0.22                   | 0.39   | 0.34   | 0.39   | 0.34   | 0.34    | 0.07     |
| X <sub>or</sub>                | 0.04                   | 0.03   | 0.04   | 0.03   | 0.04   | 0.04    | 0.01     |
