# Supplementary material for: Post-Hercynian ultrahigh-temperature tectono-metamorphic evolution of the Middle Atlas lower crust (central Morocco) revealed by metapelitic granulite xenoliths
Source: Copernicus journal article supplement (doi:10.5194/se-16-1-2025), 2025-01-03
Supplement: Supplementary file 11 [file se-16-1-2025-supplement.zip]

Table S7 - Oxydes

| G2                                            |              |       |       |         |          |          |       |       |         |          | G3           |        |          |       |         |          |
|-----------------------------------------------|--------------|-------|-------|---------|----------|----------|-------|-------|---------|----------|--------------|--------|----------|-------|---------|----------|
| Wt%                                           | Ti-Magnetite |       |       |         |          | Ilmenite |       |       |         |          | Ti-Magnetite |        | Ilmenite |       |         |          |
|                                               | 23           | 29    | 30    | average | $\sigma$ | 30       | 22    | 32    | average | $\sigma$ | 29           | 26     | 54       | 55    | average | $\sigma$ |
| SiO <sub>2</sub>                              | 0.01         | 0.13  | 0.16  | 0.10    | 0.08     | 0.12     | 0     | 0.01  | 0.04    | 0.07     | 0.13         | 0.08   | 0.77     | 0     | 0.20    | 0.42     |
| TiO <sub>2</sub>                              | 19.39        | 15.33 | 18.28 | 17.67   | 2.10     | 36.05    | 44.88 | 47.85 | 42.93   | 6.14     | 15.33        | 46.86  | 44.27    | 44.18 | 45.10   | 1.52     |
| Al <sub>2</sub> O <sub>3</sub>                | 6.77         | 6.26  | 9.89  | 7.64    | 1.97     | 0.20     | 1.07  | 0.98  | 0.75    | 0.48     | 6.26         | 0.90   | 0.77     | 0.77  | 0.81    | 0.08     |
| FeO(T)                                        | 67.85        | 71.24 | 65.64 | 68.24   | 2.82     | 55.28    | 48.83 | 45.54 | 49.88   | 4.96     | 71.24        | 52.00  | 50.27    | 50.14 | 50.80   | 1.03     |
| MnO                                           | 0.46         | 0.31  | 0.87  | 0.55    | 0.29     | 0.19     | 0.42  | 1.00  | 0.54    | 0.42     | 0.31         | 0.16   | 0.04     | 0.05  | 0.08    | 0        |
| MgO                                           | 2.26         | 1.78  | 2.69  | 2.24    | 0.46     | 1.59     | 2.43  | 3.17  | 2.40    | 0.79     | 1.78         | 1.61   | 1.45     | 1.54  | 1.53    | 0.08     |
| CaO                                           | 0            | 0     | 0.03  | 0.01    | 0.02     | 0        | 0.02  | 0     | 1       | 0.01     | 0            | 0      | 0.06     | 0.03  | 0.03    | 0.03     |
| Cr <sub>2</sub> O <sub>3</sub>                | 0            | 0.44  | 0     | 0.15    | 0.25     | 0.20     | 0     | 0     | 0.07    | 0.12     | 0.44         | 0.34   | 0        | 0     | 0.11    | 0.20     |
| Fe <sub>2</sub> O <sub>3</sub> <sup>rec</sup> | 24.20        | 31.28 | 23.05 | 26.18   | 4.46     | 28.60    | 14.71 | 10.17 | 17.83   | 9.60     | 31.287       | 14.21  | 13.59    | 14.71 | 14.17   | 0.56     |
| FeO <sup>rec</sup>                            | 46.08        | 43.10 | 44.90 | 44.69   | 1.50     | 29.55    | 35.60 | 36.39 | 33.84   | 3.74     | 43.10        | 39.22  | 38.04    | 36.91 | 38.06   | 1.15     |
| $\Sigma$ rec                                  | 99.17        | 98.62 | 99.87 | 99.22   | 0.63     | 96.50    | 99.12 | 99.57 | 98.40   | 1.66     | 98.62        | 103.37 | 99.00    | 98.19 | 100.19  | 2.79     |
| Si                                            | 0            | 0.01  | 0.01  | 0       | 0        | 0        | 0     | 0     | 0       | 0        | 0            | 0      | 0.02     | 0     | 0.01    | 0.01     |
| Ti                                            | 0.53         | 0.42  | 0.48  | 0.48    | 0.05     | 0.71     | 0.85  | 0.89  | 0.82    | 0.09     | 0.42         | 0.85   | 0.84     | 0.85  | 0.85    | 0.01     |
| Al                                            | 0.29         | 0.27  | 0.41  | 0.32    | 0.08     | 0.01     | 0.03  | 0.03  | 0.02    | 0.01     | 0.27         | 0.03   | 0.02     | 0.02  | 0.02    | 0        |
| Fe <sup>3+ rec</sup>                          | 0.66         | 0.86  | 0.61  | 0.71    | 0.13     | 0.56     | 0.28  | 0.19  | 0.34    | 0.20     | 0.86         | 0.26   | 0.26     | 0.28  | 0.27    | 0.01     |
| Fe <sup>2+rec</sup>                           | 1.39         | 1.32  | 1.32  | 1.34    | 0.04     | 0.65     | 0.75  | 0.75  | 0.72    | 0.06     | 1.32         | 0.79   | 0.80     | 0.79  | 0.79    | 0.01     |
| Mn                                            | 0.01         | 0.01  | 0.03  | 0.02    | 0.01     | 0        | 0.01  | 0.02  | 0.01    | 0.01     | 0.1          | 0      | 0        | 0     | 0       | 0        |
| Mg                                            | 0.12         | 0.10  | 0.14  | 0.12    | 0.02     | 0.06     | 0.09  | 0.12  | 0.90    | 0.03     | 0.10         | 0.06   | 0.06     | 0.06  | 0.06    | 0        |
| Ca                                            | 0            | 0     | 0     | 0       | 0        | 0        | 0     | 0     | 0       | 0        | 0            | 0      | 0        | 0     | 0       | 0        |
| $\Sigma$                                      | 3.00         | 3.00  | 3.00  | 3.00    | 0        | 2.00     | 2.00  | 2.00  | 2.00    | 0        | 3.00         | 2.00   | 2.00     | 2.00  | 2.00    | 0        |
| Mol % Usp                                     | 0.59         | 0.47  | 0.58  | 0.54    | 0.06     |          |       |       |         |          | 0.47         |        |          |       |         |          |
| Mol % Ilm                                     |              |       |       |         |          | 0.71     | 0.86  | 0.90  | 0.83    | 0.10     |              | 0.89   | 0.86     | 0.86  | 0.86    | 0.01     |

|                                               | G4    |       | TAF500   |       |       |         |      | TAF 501      |       |          |       |        |         |      |
|-----------------------------------------------|-------|-------|----------|-------|-------|---------|------|--------------|-------|----------|-------|--------|---------|------|
|                                               | Ti-Mt | Il    | Ilmenite |       |       |         |      | Ti-Magnetite |       | Ilmenite |       |        |         |      |
| Wt%                                           | 55    | 59    | 8        | 71    | 8i    | average | σ    | 8            | 43    | 9        | 42    | 17     | average | σ    |
| SiO <sub>2</sub>                              | 0.07  | 0.04  | 0.06     | 0.07  | 0.19  | 0.11    | 0.07 | 0.03         | 0.06  | 0        | 0.06  | 0.06   | 0.04    | 0.04 |
| TiO <sub>2</sub>                              | 15.38 | 42.87 | 44.96    | 39.5  | 48.37 | 44.28   | 4.47 | 24.77        | 25.12 | 49.09    | 50.25 | 47.39  | 48.91   | 1.43 |
| Al <sub>2</sub> O <sub>3</sub>                | 7.64  | 1.39  | 2.24     | 2.73  | 0.78  | 1.92    | 1.01 | 8.63         | 3.66  | 0.91     | 0.65  | 1.30   | 0.95    | 0.33 |
| FeO(T)                                        | 69.75 | 49.07 | 48.50    | 51.83 | 44.06 | 48.13   | 3.90 | 61.73        | 65.26 | 45.43    | 44.38 | 47.49  | 45.77   | 1.58 |
| MnO                                           | 0.19  | 0.31  | 0.36     | 0.22  | 1.12  | 0.57    | 0.48 | 0.59         | 0.47  | 0.55     | 0.48  | 0.72   | 0.58    | 0.12 |
| MgO                                           | 1.44  | 2.81  | 2.56     | 2.07  | 2.44  | 2.36    | 0.26 | 2.12         | 1.90  | 2.61     | 2.47  | 2.22   | 2.43    | 0.20 |
| CaO                                           | 0     | 0     | 0        | 0     | 0     | 0       | 0    | 0.01         | 0     | 0.03     | 0     | 0      | 0.01    | 0.02 |
| Cr <sub>2</sub> O <sub>3</sub>                | 0.23  | 0.10  | 0.20     | 0.28  | 0.10  | 0.19    | 0.09 | 0            | 0.39  | 0        | 0.16  | 0      | 0.05    | 0.09 |
|                                               |       |       |          |       |       |         |      |              |       |          |       |        |         |      |
| Fe <sub>2</sub> O <sub>3</sub> <sup>rec</sup> | 29.03 | 17.54 | 14.35    | 22.37 | 6.45  | 14.39   | 7.96 | 11.42        | 15.58 | 7.24     | 4.44  | 10.53  | 7.40    | 3.05 |
| FeO <sup>rec</sup>                            | 43.63 | 33.29 | 35.59    | 31.70 | 38.26 | 35.18   | 3.30 | 51.46        | 51.25 | 38.91    | 40.39 | 38.02  | 39.10   | 1.20 |
| Σ rec                                         | 97.61 | 98.35 | 100.32   | 98.95 | 97.71 | 98.99   | 1.30 | 99.03        | 98.42 | 99.35    | 98.90 | 100.24 | 99.49   | 0.68 |
|                                               |       |       |          |       |       |         |      |              |       |          |       |        |         |      |
| Si                                            | 0     | 0     | 0        | 0     | 0.01  | 0       | 0    | 0            | 0     | 0        | 0     | 0      | 0       | 0    |
| Ti                                            | 0.43  | 0.81  | 0.83     | 0.74  | 0.92  | 0.83    | 0.09 | 0.66         | 0.70  | 0.92     | 0.95  | 0.88   | 0.92    | 0.03 |
| Al                                            | 0.33  | 0.04  | 0.06     | 0.08  | 0.02  | 0.06    | 0.03 | 0.36         | 0.16  | 0.03     | 0.02  | 0.04   | 0.03    | 0.01 |
| Fe <sup>3+ rec</sup>                          | 0.80  | 0.33  | 0.27     | 0.42  | 0.12  | 0.27    | 0.15 | 0.31         | 0.43  | 0.14     | 0.08  | 0.20   | 0.14    | 0.06 |
| Fe <sup>2+rec</sup>                           | 1.34  | 0.70  | 0.73     | 0.66  | 0.81  | 0.74    | 0.07 | 1.53         | 1.58  | 0.81     | 0.85  | 0.79   | 0.81    | 0.03 |
| Mn                                            | 0.01  | 0.01  | 0.01     | 0.01  | 0.02  | 0.01    | 0.01 | 0.02         | 0.02  | 0.01     | 0.01  | 0.02   | 0.01    | 0    |
| Mg                                            | 0.05  | 0.11  | 0.09     | 0.08  | 0.09  | 0.09    | 0.01 | 0.11         | 0.10  | 0.10     | 0.09  | 0.08   | 0.09    | 0.01 |
| Ca                                            | 0     | 0     | 0        | 0     | 0     | 0       | 0    | 0            | 0     | 0        | 0     | 0      | 0       | 0    |
| Σ                                             | 3.00  | 2.00  | 2.00     | 2.00  | 2.00  | 2.00    | 2.00 | 3.00         | 3.00  | 2.00     | 2.00  | 2.00   | 2.00    | 0    |
|                                               |       |       |          |       |       |         |      |              |       |          |       |        |         |      |
| Mol % Usp                                     | 0.48  |       |          |       |       |         |      | 0.76         | 0.74  |          |       |        |         |      |
| Mol % Ilm                                     |       | 0.83  | 0.87     | 0.79  | 0.93  | 0.86    | 0.07 |              |       | 0.93     | 0.96  | 0.90   | 0.93    | 0.03 |
