# Supplementary material for: Post-Hercynian ultrahigh-temperature tectono-metamorphic evolution of the Middle Atlas lower crust (central Morocco) revealed by metapelitic granulite xenoliths
Source: Copernicus journal article supplement (doi:10.5194/se-16-1-2025), 2025-01-03
Supplement: Supplementary file 12 [file se-16-1-2025-supplement.zip]

**Table S6 - Rutile**

| Wt%                            | G3    |        |       |         |          | TAF501 |       |       |         |          |
|--------------------------------|-------|--------|-------|---------|----------|--------|-------|-------|---------|----------|
|                                | 24    | 56     | 57    | average | $\sigma$ | 26     | 34    | 35    | average | $\sigma$ |
| SiO <sub>2</sub>               | 0.08  | 0.03   | 0.02  | 0.04    | 0.02     | 0.09   | 0.05  | 0.06  | 0.07    | 0.02     |
| TiO <sub>2</sub>               | 98.33 | 99.84  | 99.63 | 99.27   | 0.62     | 99.43  | 99.63 | 98.81 | 99.29   | 0.43     |
| Al <sub>2</sub> O <sub>3</sub> | 0.41  | 0.15   | 0.07  | 0.21    | 0.13     | 0.2    | 0.22  | 0.25  | 0.22    | 0.03     |
| FeO T                          | 0.2   | 0.1    | 0.04  | 0.11    | 0.06     | 0.08   | 0.08  | 0.03  | 0.06    | 0.03     |
| MnO                            | 0.03  | 0      | 0.02  | 0.02    | 0.01     | 0      | 0     | 0.14  | 0.05    | 0.08     |
| MgO                            | 0.03  | 0.02   | 0.01  | 0.02    | 0.01     | 0.03   | 0.01  | 0.01  | 0.02    | 0.01     |
| $\Sigma$                       | 99.08 | 100.14 | 99.79 | 99.67   | 0.39     | 99.95  | 99.99 | 99.30 | 99.75   | 0.39     |
