# Supplementary material for: Post-Hercynian ultrahigh-temperature tectono-metamorphic evolution of the Middle Atlas lower crust (central Morocco) revealed by metapelitic granulite xenoliths
Source: Copernicus journal article supplement (doi:10.5194/se-16-1-2025), 2025-01-03
Supplement: Supplementary file 13 [file se-16-1-2025-supplement.zip]

**Table S4 - Orthopyroxene**

|                                    | G2                             |       |        |        |         |          |                        |       |       |         |          |
|------------------------------------|--------------------------------|-------|--------|--------|---------|----------|------------------------|-------|-------|---------|----------|
|                                    | Opx in kelyphite around garnet |       |        |        |         |          | Euohedral Opx in glass |       |       |         |          |
|                                    | 1                              | 10    | 13     | 14     | average | $\sigma$ | 5                      | 16    | 32    | average | $\sigma$ |
| SiO <sub>2</sub>                   | 42.63                          | 44.57 | 44.62  | 44.72  | 44.14   | 1.01     | 44.75                  | 44.09 | 46.87 | 45.24   | 1.45     |
| TiO <sub>2</sub>                   | 0.04                           | 0.02  | 0.03   | 0.01   | 0.025   | 0.01     | 0.02                   | 0.12  | 0.15  | 0.10    | 0.07     |
| Cr <sub>2</sub> O <sub>3</sub>     | 0                              | 0     | 0      | 0      |         |          | 0                      | 0     | 0.03  |         |          |
| Al <sub>2</sub> O <sub>3</sub>     | 11.24                          | 12.19 | 11.75  | 12.31  | 11.87   | 0.49     | 10.05                  | 11.19 | 19.34 | 13.53   | 5.07     |
| FeO                                | 29.55                          | 27.94 | 28.33  | 28.22  | 28.51   | 0.71     | 31.73                  | 28.76 | 22.76 | 27.75   | 4.57     |
| MnO                                | 1.46                           | 1.31  | 1.29   | 1.51   | 1.39    | 0.11     | 1.70                   | 1.43  | 0.97  | 1.37    | 0.37     |
| MgO                                | 13.29                          | 14.02 | 14.24  | 13.94  | 13.87   | 0.41     | 11.49                  | 13.64 | 9.45  | 11.53   | 2.10     |
| Na <sub>2</sub> O                  | 0                              | 0     | 0      | 0.01   |         |          | 0.02                   | 0     | 0.02  | 0.01    | 0.01     |
| CaO                                | 0.41                           | 0.45  | 0.46   | 0.46   | 0.45    | 0.02     | 0.51                   | 0.46  | 0.28  | 0.42    | 0.12     |
| $\Sigma$                           | 98.62                          | 100.5 | 100.72 | 101.17 | 100.25  | 1.12     | 100.25                 | 99.69 | 99.85 | 99.93   | 0.29     |
| Si                                 | 1.68                           | 1.71  | 1.71   | 1.71   | 1.70    | 0.02     | 1.76                   | 1.72  | 1.72  | 1.73    | 0.02     |
| Al <sup>IV</sup>                   | 0.31                           | 0.29  | 0.29   | 0.3    | 0.30    | 0.01     | 0.25                   | 0.28  | 0.29  | 0.27    | 0.02     |
| Al <sup>VI</sup>                   | 0.22                           | 0.26  | 0.24   | 0.26   | 0.25    | 0.02     | 0.22                   | 0.23  | 0.23  | 0.23    | 0.01     |
| Ti                                 | 0                              | 0     | 0      | 0      |         |          | 0                      | 0     | 0     |         |          |
| Cr                                 | 0                              | 0     | 0      | 0      |         |          | 0                      | 0     | 0     |         |          |
| Fe <sup>T</sup>                    | 0.98                           | 0.90  | 0.91   | 0.90   | 0.92    | 0.04     | 1.04                   | 0.94  | 0.94  | 0.97    | 0.06     |
| Mn                                 | 0.05                           | 0.04  | 0.04   | 0.05   | 0.05    | 0.01     | 0.06                   | 0.05  | 0.05  | 0.05    | 0.01     |
| Mg                                 | 0.79                           | 0.8   | 0.81   | 0.79   | 0.80    | 0.01     | 0.67                   | 0.79  | 0.79  | 0.75    | 0.07     |
| Na                                 | 0                              | 0     | 0      | 0      |         |          | 0                      | 0     | 0     |         |          |
| Ca                                 | 0.02                           | 0.02  | 0.02   | 0.02   | 0.02    | 0        | 0.02                   | 0.02  | 0.02  | 0.02    | 0        |
| $\Sigma$ (M1+M2)                   | 2.05                           | 2.02  | 2.02   | 2.02   | 2.03    | 0.02     | 2.01                   | 2.03  | 2.03  | 2.02    | 0.01     |
| X <sub>FeT</sub>                   | 0.56                           | 0.53  | 0.53   | 0.53   | 0.54    | 0.02     | 0.61                   | 0.54  | 0.54  | 0.56    | 0.04     |
| Fe <sup>3+rec</sup>                | 0.14                           | 0.05  | 0.07   | 0.06   | 0.08    | 0.04     | 0.04                   | 0.07  | 0.07  | 0.06    | 0.02     |
| Fe <sup>2+rec</sup>                | 0.83                           | 0.84  | 0.83   | 0.84   | 0.84    | 0.01     | 1.00                   | 0.86  | 0.86  | 0.90    | 0.08     |
| Fe <sup>3+</sup> /Fe <sup>2+</sup> | 14.14                          | 5.41  | 7.80   | 6.16   | 8.38    | 3.97     | 3.60                   | 7.87  | 7.87  | 6.45    | 2.46     |
| X <sub>Fe</sub> <sup>2+rec</sup>   | 0.51                           | 0.51  | 0.51   | 0.52   | 0.51    | 0.01     | 0.60                   | 0.52  | 0.52  | 0.55    | 0.05     |

|                                    | G3                             |       |        |       |        |        |       |        |       |         |          |                       |        |        |         |          |
|------------------------------------|--------------------------------|-------|--------|-------|--------|--------|-------|--------|-------|---------|----------|-----------------------|--------|--------|---------|----------|
|                                    | Opx in kelyphite around garnet |       |        |       |        |        |       |        |       |         |          | Euhedral Opx in glass |        |        |         |          |
|                                    | 9                              | 16    | 43     | 44    | 46     | 47     | 48    | 60     | 61    | average | $\sigma$ | 8                     | 13     | 54     | average | $\sigma$ |
| SiO <sub>2</sub>                   | 47.22                          | 44.42 | 42.83  | 45.08 | 44.78  | 41.12  | 45.85 | 47.03  | 47.63 | 45.11   | 2.14     | 45.34                 | 37.99  | 48.17  | 43.83   | 5.25     |
| TiO <sub>2</sub>                   | 1.06                           | 0.13  | 0.87   | 0.44  | 0.36   | 0.83   | 0.41  | 0.04   | 0.11  | 0.47    | 0.37     | 0.16                  | 0.07   | 0.16   | 0.13    | 0.05     |
| Cr <sub>2</sub> O <sub>3</sub>     | 0                              | 0     | 0      | 0     | 0      | 0      | 0     | 0      | 0     |         |          | 0                     | 0      | 0.03   |         |          |
| Al <sub>2</sub> O <sub>3</sub>     | 7.91                           | 8.93  | 14.49  | 10.37 | 14.42  | 18.62  | 8.92  | 8.71   | 7.62  | 11.11   | 3.8      | 10.51                 | 16.52  | 9.77   | 12.27   | 3.70     |
| FeO                                | 27.83                          | 32.64 | 26.9   | 27.97 | 25.24  | 24.54  | 28.74 | 29.42  | 26.93 | 27.80   | 2.39     | 27.45                 | 32.75  | 28.07  | 29.42   | 2.90     |
| MnO                                | 0.55                           | 0.84  | 0.44   | 0.55  | 0.41   | 0.4    | 0.61  | 0.64   | 0.5   | 0.55    | 0.14     | 0.44                  | 0.6    | 0.77   | 0.60    | 0.17     |
| MgO                                | 14.46                          | 12.26 | 15.24  | 14.69 | 16.33  | 14.31  | 14.01 | 13.8   | 15.99 | 14.57   | 1.22     | 14.44                 | 11.72  | 13.37  | 13.18   | 1.37     |
| Na <sub>2</sub> O                  | 0                              | 0.01  | 0.01   | 0     | 0.01   | 0.04   | 0.01  | 0.04   | 0.01  | 0.01    | 0.02     | 0                     | 0.01   | 0.14   | 0.05    | 0.08     |
| CaO                                | 0.46                           | 0.74  | 0.3    | 0.32  | 0.24   | 0.24   | 0.42  | 0.41   | 0.30  | 0.38    | 0.16     | 0.22                  | 0.38   | 0.74   | 0.45    | 0.27     |
| $\Sigma$                           | 99.49                          | 99.96 | 101.07 | 99.42 | 101.78 | 100.06 | 98.96 | 100.05 | 99.08 | 99.99   | 0.92     | 98.56                 | 100.03 | 101.08 | 99.89   | 1.27     |
| Si                                 | 1.82                           | 1.75  | 1.62   | 1.74  | 1.66   | 1.55   | 1.79  | 1.73   | 1.81  | 1.72    | 0.09     | 1.76                  | 1.51   | 1.82   | 1.70    | 0.17     |
| Al <sup>IV</sup>                   | 0.18                           | 0.25  | 0.38   | 0.26  | 0.34   | 0.45   | 0.21  | 0.27   | 0.19  | 0.28    | 0.09     | 0.24                  | 0.49   | 0.18   | 0.30    | 0.17     |
| Al <sup>VI</sup>                   | 0.18                           | 0.17  | 0.27   | 0.22  | 0.29   | 0.38   | 0.20  | 0.57   | 0.21  | 0.28    | 0.13     | 0.24                  | 0.28   | 0.25   | 0.26    | 0.02     |
| Ti                                 | 0.03                           | 0     | 0.03   | 0.01  | 0.01   | 0.02   | 0.01  | 0      | 0     | 0.01    | 0.01     | 0.01                  | 0      | 0.01   |         |          |
| Cr                                 | 0                              | 0     | 0      | 0     | 0      | 0      | 0     | 0      | 0     |         |          | 0                     | 0      | 0      |         |          |
| Fe <sup>T</sup>                    | 0.90                           | 1.08  | 0.85   | 0.90  | 0.78   | 0.78   | 0.94  | 0.70   | 0.95  | 0.88    | 0.11     | 0.89                  | 1.09   | 0.89   | 0.96    | 0.12     |
| Mn                                 | 0.02                           | 0.03  | 0.01   | 0.02  | 0.01   | 0.01   | 0.02  | 0.03   | 0.02  | 0.02    | 0.11     | 0.02                  | 0.02   | 0.03   | 0.02    | 0.01     |
| Mg                                 | 0.83                           | 0.72  | 0.86   | 0.85  | 0.90   | 0.81   | 0.81  | 0.52   | 0.79  | 0.79    | 0.11     | 0.84                  | 0.69   | 0.75   | 0.76    | 0.07     |
| Na                                 | 0                              | 0     | 0      | 0     | 0      | 0      | 0     | 0      | 0     |         |          | 0                     | 0      | 0.01   |         |          |
| Ca                                 | 0.02                           | 0.03  | 0.01   | 0.01  | 0.01   | 0.01   | 0.02  | 0.01   | 0.01  | 0.01    | 0.01     | 0.01                  | 0.02   | 0.03   | 0.02    | 0.01     |
| $\Sigma$ (M1+M2)                   | 1.97                           | 2.03  | 2.03   | 2.01  | 2.01   | 2.01   | 2.00  | 1.84   | 1.99  | 1.99    | 0.06     | 2.00                  | 2.10   | 1.95   | 2.02    | 0.08     |
| X <sub>FeT</sub>                   | 0.52                           | 0.60  | 0.50   | 0.52  | 0.46   | 0.49   | 0.54  | 0.57   | 0.54  | 0.53    | 0.04     | 0.52                  | 0.61   | 0.54   | 0.56    | 0.05     |
| Fe <sup>3+rec</sup>                | 0                              | 0.10  | 0.09   | 0.03  | 0.04   | 0.03   | 0     | 0      | 0     | 0.03    | 0.04     | 0                     | 0.30   | 0      | 0.10    | 0.17     |
| Fe <sup>2+rec</sup>                | 0.90                           | 0.97  | 0.75   | 0.88  | 0.74   | 0.74   | 0.94  | 0.73   | 0.95  | 0.84    | 0.10     | 0.89                  | 0.76   | 0.90   | 0.85    | 0.08     |
| Fe <sup>3+</sup> /Fe <sup>2+</sup> | 0                              | 9.42  | 10.84  | 2.91  | 4.90   | 4.17   | 0     | 0      | 0     | 3.58    | 4.19     | 0                     | 27.65  | 0      | 9.22    | 15.96    |

|                                    |       |       |        |       |        |        |         |          |                       |       |       |       |       |         |          |      |      |
|------------------------------------|-------|-------|--------|-------|--------|--------|---------|----------|-----------------------|-------|-------|-------|-------|---------|----------|------|------|
| $X_{\text{Fe}}^{2+\text{rec}}$     | 0.52  | 0.57  | 0.47   | 0.51  | 0.45   | 0.48   | 0.54    | 0.584    | 0.55                  | 0.52  | 0.05  |       | 0.52  | 0.52    | 0.54     | 0.53 | 0.01 |
| G4                                 |       |       |        |       |        |        |         |          |                       |       |       |       |       |         |          |      |      |
| Opx in kelyphite around garnet     |       |       |        |       |        |        |         |          | Euhedral Opx in glass |       |       |       |       |         |          |      |      |
|                                    | 64    | 66    | 67     | 68    | 56     | 59     | average | $\sigma$ |                       | 6     | 8     | 9     | 10    | average | $\sigma$ |      |      |
| SiO <sub>2</sub>                   | 45.85 | 44.27 | 45.73  | 45.14 | 43.25  | 43.42  | 44.61   | 1.14     |                       | 45.03 | 46.3  | 44.29 | 46.78 | 45.60   | 1.14     |      |      |
| TiO <sub>2</sub>                   | 0     | 0.12  | 0.04   | 0.09  | 0.46   | 0.13   | 0.14    | 0.16     |                       | 0.08  | 0.05  | 1.06  | 0.09  | 0.32    | 0.49     |      |      |
| Cr <sub>2</sub> O <sub>3</sub>     | 0     | 0     | 0      | 0     | 0.01   | 0.01   |         |          |                       | 0     | 0     | 0     | 0     |         |          |      |      |
| Al <sub>2</sub> O <sub>3</sub>     | 10.23 | 14.02 | 10.03  | 11.98 | 14.17  | 17.52  | 12.99   | 2.84     |                       | 13.34 | 11.02 | 13.41 | 10    | 11.94   | 1.71     |      |      |
| FeO                                | 28.13 | 25.45 | 29.76  | 26.69 | 26.01  | 25.85  | 26.98   | 1.65     |                       | 24.5  | 25.3  | 22.73 | 25.83 | 24.59   | 1.36     |      |      |
| MnO                                | 0.98  | 0.83  | 1.05   | 0.91  | 0.75   | 0.07   | 0.77    | 0.36     |                       | 0.94  | 1     | 0.92  | 1.21  | 1.02    | 0.13     |      |      |
| MgO                                | 14.23 | 14.76 | 13.28  | 14.43 | 15.13  | 11.96  | 13.97   | 1.16     |                       | 14.35 | 14.79 | 16.22 | 15.01 | 15.09   | 0.80     |      |      |
| Na <sub>2</sub> O                  | 0     | 0     | 0.04   | 0     | 0      | 0      | 0.01    | 0.02     |                       | 0.01  | 0     | 0.02  | 0.02  | 0.01    | 0.01     |      |      |
| CaO                                | 0.44  | 0.28  | 0.49   | 0.49  | 0.33   | 1.32   | 0.56    | 0.38     |                       | 0.36  | 0.44  | 0.47  | 0.48  | 0.44    | 0.05     |      |      |
| $\Sigma$                           | 99.86 | 99.73 | 100.38 | 99.73 | 100.11 | 100.28 | 100.02  | 0.28     |                       | 98.60 | 98.90 | 99.10 | 99.40 | 99.00   | 0.34     |      |      |
| Si                                 | 1.77  | 1.68  | 1.77   | 1.73  | 1.65   | 1.64   | 1.71    | 0.06     |                       | 1.72  | 1.77  | 1.68  | 1.79  | 1.74    | 0.05     |      |      |
| Al <sup>IV</sup>                   | 0.24  | 0.32  | 0.23   | 0.27  | 0.35   | 0.36   | 0.30    | 0.06     |                       | 0.28  | 0.23  | 0.32  | 0.21  | 0.26    | 0.05     |      |      |
| Al <sup>VI</sup>                   | 0.23  | 0.31  | 0.22   | 0.27  | 0.28   | 0.42   | 0.29    | 0.07     |                       | 0.32  | 0.27  | 0.28  | 0.24  | 0.28    | 0.03     |      |      |
| Ti                                 | 0     | 0     | 0      | 0     | 0.01   | 0      |         |          |                       | 0     | 0     | 0.03  | 0     |         |          |      |      |
| Cr                                 | 0     | 0     | 0      | 0     | 0      | 0      |         |          |                       | 0     | 0     | 0     | 0     |         |          |      |      |
| Fe <sup>T</sup>                    | 0.91  | 0.81  | 0.91   | 0.86  | 0.83   | 0.82   | 0.86    | 0.04     |                       | 0.78  | 0.81  | 0.72  | 0.83  | 0.79    | 0.05     |      |      |
| Mn                                 | 0.03  | 0.03  | 0.03   | 0.03  | 0.02   | 0      | 0.02    | 0.01     |                       | 0.03  | 0.03  | 0.03  | 0.04  | 0.03    | 0.01     |      |      |
| Mg                                 | 0.82  | 0.84  | 0.76   | 0.82  | 0.86   | 0.67   | 0.80    | 0.07     |                       | 0.82  | 0.84  | 0.92  | 0.86  | 0.86    | 0.04     |      |      |
| Na                                 | 0     | 0     | 0      | 0     | 0      | 0      |         |          |                       | 0     | 0     | 0     | 0     |         |          |      |      |
| Ca                                 | 0.02  | 0.01  | 0.02   | 0.02  | 0.01   | 0.05   | 0.02    | 0.02     |                       | 0.02  | 0.02  | 0.02  | 0.02  | 0.02    | 0        |      |      |
| $\Sigma$ (M1+M2)                   | 2.00  | 2.00  | 2.00   | 2.00  | 2.02   | 2.00   | 2.00    | 0.01     |                       | 1.97  | 1.98  | 1.99  | 1.98  | 1.98    | 0.01     |      |      |
| $X_{\text{FeT}}$                   | 0.53  | 0.49  | 0.56   | 0.51  | 0.49   | 0.55   | 0.52    | 0.03     |                       | 0.49  | 0.49  | 0.44  | 0.49  | 0.48    | 0.03     |      |      |
| Fe <sup>3+rec</sup>                | 0.01  | 0     | 0.02   | 0     | 0.06   | 0      | 0.02    | 0.02     |                       | 0     | 0     | 0     | 0     |         |          |      |      |
| Fe <sup>2+rec</sup>                | 0.90  | 0.81  | 0.94   | 0.86  | 0.80   | 0.82   | 0.86    | 0.06     |                       | 0.79  | 0.82  | 0.72  | 0.83  | 0.79    | 0.05     |      |      |
| Fe <sup>3+</sup> /Fe <sup>2+</sup> | 0.79  | 0     | 2.01   | 0     | 8.45   | 0      | 1.88    | 3.32     |                       | 0     | 0     | 0     | 0     |         |          |      |      |

|                                    |                                |       |        |         |        |        |       |         |      |                       |       |       |       |       |       |         |      |
|------------------------------------|--------------------------------|-------|--------|---------|--------|--------|-------|---------|------|-----------------------|-------|-------|-------|-------|-------|---------|------|
| X <sub>Fe</sub> <sup>2+rec</sup>   | 0.52                           | 0.49  | 0.55   | 0.51    | 0.47   | 0.55   | 0.52  | 0.03    |      | 0.49                  | 0.49  | 0.44  | 0.49  | 0.48  | 0.03  |         |      |
|                                    | TAF500                         |       |        |         |        |        |       |         |      |                       |       |       |       |       |       |         |      |
|                                    | Opx in kelyphite around garnet |       |        |         |        |        |       |         |      | Euhedral Opx in glass |       |       |       |       |       |         |      |
|                                    | 6 core                         | 6 rim | 7      | 9       | 15     | 27     | 43    | average | σ    |                       | 9     | 18    | 31    | 68    | 70    | average | σ    |
| SiO <sub>2</sub>                   | 41.42                          | 41.25 | 43.96  | 42.87   | 43.09  | 44.41  | 45.39 | 43.20   | 1.52 |                       | 43.63 | 43.97 | 45.04 | 42.32 | 44.03 | 43.80   | 0.98 |
| TiO <sub>2</sub>                   | 0.92                           | 1.08  | 1.07   | 0.94    | 1.04   | 0.71   | 0.71  | 0.92    | 0.16 |                       | 0.86  | 1.73  | 1.01  | 2.53  | 1.16  | 1.46    | 0.68 |
| Cr <sub>2</sub> O <sub>3</sub>     | 0.01                           | 0     | 0.04   | 9       | 0.03   | 0.03   | 0.04  | 0.02    | 0.02 |                       | 0     | 0     | 0.03  | 0.04  | 0.02  | 0.02    | 0.02 |
| Al <sub>2</sub> O <sub>3</sub>     | 15.20                          | 15.16 | 13.89  | 14.68   | 14.85  | 10.92  | 10.87 | 13.65   | 1.93 |                       | 13.68 | 13.04 | 16.46 | 12.33 | 12.38 | 13.58   | 1.70 |
| FeO                                | 24.1                           | 24.42 | 24.03  | 24.03   | 24.86  | 26.05  | 24.87 | 24.62   | 0.73 |                       | 22.84 | 22.22 | 22.4  | 27.58 | 24.68 | 23.94   | 2.26 |
| MnO                                | 0.64                           | 0.69  | 0.72   | 0.72    | 0.6    | 0.93   | 0.57  | 0.70    | 0.12 |                       | 0.94  | 0.75  | 0.76  | 1.07  | 0.82  | 0.87    | 0.14 |
| MgO                                | 15.88                          | 15.49 | 16.28  | 16.24   | 15.87  | 16.83  | 17.09 | 16.24   | 0.56 |                       | 15.66 | 16.11 | 11.86 | 12.92 | 16.28 | 14.57   | 2.03 |
| Na <sub>2</sub> O                  | 0                              | 0.01  | 0.01   | 0.01    | 0      | 0.01   | 0.04  | 0.01    | 0.01 |                       | 0.02  | 0     | 0.07  | 0.02  | 0.01  | 0.02    | 0.03 |
| CaO                                | 0.28                           | 0.3   | 0.63   | 0.634   | 0.29   | 0.54   | 0.43  | 0.44    | 0.16 |                       | 0.48  | 0.59  | 2.10  | 0.99  | 0.57  | 0.95    | 0.67 |
| Σ                                  | 98.45                          | 98.38 | 100.62 | 100.123 | 100.63 | 100.42 | 99.97 | 99.80   | 0.98 |                       | 98.09 | 98.41 | 99.66 | 99.78 | 99.94 | 99.18   | 0.86 |
|                                    |                                |       |        |         |        |        |       |         |      |                       |       |       |       |       |       |         |      |
| Si                                 | 1.61                           | 1.59  | 1.60   | 1.62    | 1.62   | 1.69   | 1.72  | 1.64    | 0.05 |                       | 1.67  | 1.68  | 1.69  | 1.64  | 1.67  | 1.67    | 0.02 |
| Al <sup>IV</sup>                   | 0.41                           | 0.41  | 0.35   | 0.38    | 0.38   | 0.31   | 0.28  | 0.36    | 0.05 |                       | 0.33  | 0.32  | 0.31  | 0.36  | 0.33  | 0.33    | 0.02 |
| Al <sup>VI</sup>                   | 0.29                           | 0.28  | 0.27   | 0.28    | 0.28   | 0.18   | 0.21  | 0.26    | 0.04 |                       | 0.29  | 0.26  | 0.41  | 0.21  | 0.23  | 0.28    | 0.08 |
| Ti                                 | 0.03                           | 0.03  | 0.03   | 0.03    | 0.03   | 0.02   | 0.02  | 0.03    | 0.01 |                       | 0.03  | 0.05  | 0.03  | 0.08  | 0.03  | 0.04    | 0.02 |
| Cr                                 | 0.01                           | 0     | 0      | 0       | 0      | 0      | 0     |         |      |                       | 0     | 0     | 0     | 0     | 0     |         |      |
| Fe <sup>T</sup>                    | 0.78                           | 0.79  | 0.76   | 0.76    | 0.78   | 0.83   | 0.79  | 0.78    | 0.02 |                       | 0.73  | 0.71  | 0.70  | 0.90  | 0.78  | 0.76    | 0.08 |
| Mn                                 | 0.02                           | 0.02  | 0.02   | 0.02    | 0.02   | 0.03   | 0.02  | 0.02    | 0    |                       | 0.032 | 0.02  | 0.02  | 0.04  | 0.03  | 0.03    | 0.01 |
| Mg                                 | 0.91                           | 0.89  | 0.91   | 0.92    | 0.89   | 0.96   | 0.97  | 0.92    | 0.03 |                       | 0.90  | 0.92  | 0.66  | 0.745 | 0.92  | 0.83    | 0.12 |
| Na                                 | 0                              | 0     | 0      | 0       | 0      | 0      | 0     |         |      |                       | 0     | 0     | 0.01  | 0     | 0     |         |      |
| Ca                                 | 0.01                           | 0.01  | 0.03   | 0.03    | 0.01   | 0.02   | 0.2   | 0.04    | 0.07 |                       | 0.02  | 0.02  | 0.08  | 0.04  | 0.02  | 0.04    | 0.03 |
| Σ (M1+M2)                          | 2.03                           | 2.03  | 2.01   | 2.03    | 2.02   | 2.04   | 2.02  | 2.03    | 0.01 |                       | 2.00  | 1.98  | 1.92  | 2.00  | 2.02  | 1.98    | 0.04 |
| X <sub>FeT</sub>                   | 0.46                           | 0.47  | 0.45   | 0.45    | 0.47   | 0.47   | 0.45  | 0.46    | 0.10 |                       | 0.45  | 0.44  | 0.52  | 0.54  | 0.46  | 0.48    | 0.05 |
|                                    |                                |       |        |         |        |        |       |         |      |                       |       |       |       |       |       |         |      |
| Fe <sup>3+rec</sup>                | 0.10                           | 0.09  | 0.03   | 0.08    | 0.05   | 0.13   | 0.06  | 0.08    | 0.03 |                       | 0     | 0     | 0     | 0.01  | 0.05  | 0.01    | 0.02 |
| Fe <sup>2+rec</sup>                | 0.67                           | 0.69  | 0.72   | 0.68    | 0.73   | 0.7    | 0.73  | 0.70    | 0.02 |                       | 0.73  | 0.71  | 0.72  | 0.89  | 0.73  | 0.76    | 0.08 |
| Fe <sup>3+</sup> /Fe <sup>2+</sup> | 14.55                          | 13.03 | 4.80   | 11.34   | 7.16   | 17.91  | 7.46  | 10.89   | 4.66 |                       | 0     | 0     | 0     | 0.62  | 6.86  | 1.50    | 3.01 |
| X <sub>Fe</sub> <sup>2+rec</sup>   | 0.42                           | 0.44  | 0.44   | 0.43    | 0.45   | 0.42   | 0.43  | 0.43    | 0.01 |                       | 0.45  | 0.44  | 0.52  | 0.54  | 0.44  | 0.48    | 0.05 |

| TAF501                             |                                |        |        |        |        |       |       |         |      |                       |        |       |       |        |        |        |       |         |      |
|------------------------------------|--------------------------------|--------|--------|--------|--------|-------|-------|---------|------|-----------------------|--------|-------|-------|--------|--------|--------|-------|---------|------|
|                                    | Opx in kelpihite around garnet |        |        |        |        |       |       |         |      | Euhedral Opx in glass |        |       |       |        |        |        |       |         |      |
|                                    | 20                             | 21     | 23     | 24     | 37     | 38    | 39    | average | σ    | 2                     | 3      | 17    | 18    | 29     | 31     | 76     | 78    | average | σ    |
| SiO <sub>2</sub>                   | 47.30                          | 45.52  | 46.33  | 46.25  | 45.94  | 43.17 | 43.12 | 45.38   | 1.62 | 44.05                 | 44.82  | 45.49 | 47.91 | 43.96  | 46.33  | 42.40  | 44.31 | 44.91   | 1.68 |
| TiO <sub>2</sub>                   | 0.10                           | 0.15   | 0.03   | 0.04   | 0.05   | 0.02  | 0.17  | 0.08    | 0.06 | 0.86                  | 1.05   | 0.41  | 0.29  | 0.21   | 0.03   | 0.01   | 0.20  | 0.38    | 0.38 |
| Cr <sub>2</sub> O <sub>3</sub>     | 0.02                           | 0.05   | 0.01   | 0      | 0      | 0.02  | 0.03  | 0.012   | 0.02 | 0                     | 0      | 0     | 0.03  | 0.11   | 0.01   | 0.03   | 0.01  | 0.02    | 0.04 |
| Al <sub>2</sub> O <sub>3</sub>     | 8.81                           | 12.79  | 10.83  | 10.69  | 11.31  | 13.10 | 12.59 | 11.45   | 1.52 | 11.76                 | 10.58  | 12.1  | 8.81  | 16.94  | 10.83  | 15.66  | 12.89 | 12.45   | 2.69 |
| FeO                                | 28.6                           | 26     | 27.07  | 26.88  | 27.77  | 27.16 | 28.29 | 27.40   | 0.89 | 28.51                 | 29.23  | 24.12 | 22.82 | 22.19  | 27.07  | 26.93  | 27.61 | 26.06   | 2.66 |
| MnO                                | 0.87                           | 0.75   | 0.75   | 0.73   | 0.85   | 0.75  | 0.84  | 0.79    | 0.06 | 0.69                  | 0.66   | 0.73  | 0.68  | 0.48   | 0.75   | 0.75   | 0.81  | 0.69    | 0.10 |
| MgO                                | 14.77                          | 15.6   | 15.4   | 15.62  | 14.34  | 14.28 | 13.41 | 14.77   | 0.83 | 14.22                 | 14.38  | 16.64 | 18.93 | 17.23  | 15.4   | 14.59  | 13.64 | 15.63   | 1.82 |
| Na <sub>2</sub> O                  | 0.01                           | 0      | 0.01   | 0      | 0.01   | 0     | 0.02  | 0.01    | 0.01 | 0                     | 0.03   | 0     | 0.01  | 0.01   | 0.01   | 0      | 0     | 0.01    | 0.01 |
| CaO                                | 0.43                           | 0.32   | 0.16   | 0.34   | 0.53   | 0.37  | 0.47  | 0.37    | 0.12 | 0.33                  | 0.37   | 0.20  | 0.16  | 0.08   | 0.16   | 0.41   | 0.27  | 0.25    | 0.12 |
| Σ                                  | 100.9                          | 101.18 | 100.58 | 100.55 | 100.78 | 98.86 | 98.92 | 100.25  | 0.96 | 100.42                | 101.09 | 99.69 | 99.63 | 101.20 | 100.58 | 100.78 | 99.74 | 100.39  | 0.64 |
|                                    |                                |        |        |        |        |       |       |         |      |                       |        |       |       |        |        |        |       |         |      |
| Si                                 | 1.80                           | 1.71   | 1.76   | 1.75   | 1.75   | 1.68  | 1.68  | 1.73    | 0.05 | 1.69                  | 1.72   | 1.72  | 1.80  | 1.62   | 1.76   | 1.61   | 1.70  | 1.70    | 0.06 |
| Al <sup>IV</sup>                   | 0.20                           | 0.29   | 0.24   | 0.25   | 0.25   | 0.32  | 0.32  | 0.27    | 0.05 | 0.31                  | 0.29   | 0.28  | 0.20  | 0.38   | 0.24   | 0.39   | 0.30  | 0.30    | 0.06 |
| Al <sup>VI</sup>                   | 0.20                           | 0.27   | 0.24   | 0.23   | 0.25   | 0.28  | 0.26  | 0.25    | 0.03 | 0.23                  | 0.19   | 0.26  | 0.19  | 0.35   | 0.24   | 0.31   | 0.29  | 0.26    | 0.06 |
| Ti                                 | 0.01                           | 0      | 0      | 0      | 0      | 0     | 0.01  |         |      | 0.03                  | 0.03   | 0.01  | 0.01  | 0      | 0      | 0      | 0.01  | 0.01    | 0.01 |
| Cr                                 | 0                              | 0      | 0      | 0      | 0      | 0     | 0     |         |      | 0                     | 0      | 0     | 0     | 0      | 0      | 0      | 0     |         |      |
| Fe <sup>T</sup>                    | 0.91                           | 0.82   | 0.86   | 0.85   | 0.88   | 0.88  | 0.92  | 0.87    | 0.04 | 0.92                  | 0.94   | 0.76  | 0.72  | 0.68   | 0.86   | 0.86   | 0.89  | 0.83    | 0.10 |
| Mn                                 | 0.03                           | 0.02   | 0.02   | 0.02   | 0.02   | 0.03  | 0.03  | 0.02    | 1    | 0.02                  | 0.02   | 0.02  | 0.02  | 0.02   | 0.02   | 0.02   | 0.03  | 0.02    | 0    |
| Mg                                 | 0.84                           | 0.87   | 0.87   | 0.88   | 0.81   | 0.83  | 0.78  | 0.84    | 0.04 | 0.81                  | 0.82   | 0.94  | 1.06  | 0.95   | 0.87   | 0.83   | 0.78  | 0.88    | 0.09 |
| Na                                 | 0                              | 0      | 0      | 0      | 0      | 0     | 0     |         |      | 0                     | 0      | 0     | 0     | 0      | 0      | 0      | 0     |         |      |
| Ca                                 | 0.02                           | 0.01   | 0.10   | 0.01   | 0.02   | 0.02  | 0.02  | 0.03    | 0.03 | 0.01                  | 0.02   | 0.01  | 0.01  | 0      | 0.01   | 0.02   | 0.01  | 0.01    | 0.01 |
| Σ (M1+M2)                          | 2.00                           | 2.00   | 2.00   | 2.01   | 2.00   | 2.02  | 2.02  | 2.01    | 0.01 | 2.02                  | 2.02   | 2.00  | 2.00  | 2.01   | 2.00   | 2.04   | 2.00  | 2.01    | 0.02 |
| X <sub>FeT</sub>                   | 0.52                           | 0.48   | 0.50   | 0.49   | 0.52   | 0.52  | 0.54  | 0.51    | 0.02 | 0.53                  | 0.53   | 0.45  | 0.40  | 0.42   | 0.50   | 0.51   | 0.53  | 0.48    | 0.05 |
|                                    |                                |        |        |        |        |       |       |         |      |                       |        |       |       |        |        |        |       |         |      |
| Fe <sup>3+rec</sup>                | 0                              | 0.01   | 0      | 0.02   | 0      | 0.07  | 0.07  | 0.02    | 0.03 | 0.05                  | 0.05   | 0     | 0     | 0.02   | 0      | 0.11   | 0     | 0.03    | 0.04 |
| Fe <sup>2+rec</sup>                | 0.91                           | 0.80   | 0.86   | 0.83   | 0.88   | 0.81  | 0.85  | 0.85    | 0.04 | 0.86                  | 0.88   | 0.76  | 0.72  | 0.66   | 0.86   | 0.74   | 0.89  | 0.80    | 0.09 |
| Fe <sup>3+</sup> /Fe <sup>2+</sup> | 0                              | 1.58   | 0.37   | 2.10   | 0      | 8.84  | 7.68  | 2.94    | 3.74 | 5.66                  | 5.80   | 0.03  | 0     | 3.63   | 0.37   | 14.98  | 0     | 3.81    | 5.17 |
