# Supplementary material for: Post-Hercynian ultrahigh-temperature tectono-metamorphic evolution of the Middle Atlas lower crust (central Morocco) revealed by metapelitic granulite xenoliths
Source: Copernicus journal article supplement (doi:10.5194/se-16-1-2025), 2025-01-03
Supplement: Supplementary file 15 [file se-16-1-2025-supplement.zip]

**Table S2 - Garnet**

|                                | G2      |        |        |         |        |         |          |
|--------------------------------|---------|--------|--------|---------|--------|---------|----------|
| wt%                            | 63 core | 63 rim | 25 rim | 25 core | 15     | average | $\sigma$ |
| SiO <sub>2</sub>               | 38.18   | 38.24  | 39.32  | 38.83   | 39.22  | 38.76   | 0.53     |
| TiO <sub>2</sub>               | 0.04    | 0.02   | 0.04   | 0.01    | 0.04   | 0.02    | 0.01     |
| Cr <sub>2</sub> O <sub>3</sub> | 0.04    | 0.04   | 0.04   | 0.01    | 0.00   | 0.03    | 0.02     |
| Al <sub>2</sub> O <sub>3</sub> | 22.3    | 22.34  | 22.54  | 22.32   | 22.13  | 22.33   | 0.15     |
| FeO                            | 26.83   | 26.93  | 26.88  | 26.62   | 27.74  | 27.00   | 0.43     |
| MnO                            | 1.11    | 1.11   | 1.18   | 1.14    | 1.16   | 1.14    | 0.03     |
| MgO                            | 9.3     | 9.33   | 9.67   | 9.49    | 9.21   | 9.40    | 0.18     |
| CaO                            | 1.94    | 1.96   | 2.09   | 2.06    | 2.06   | 2.02    | 0.07     |
| $\Sigma$                       | 99.76   | 99.97  | 101.76 | 100.48  | 101.56 | 100.71  | 0.91     |
| Si                             | 2.95    | 2.95   | 2.97   | 2.97    | 2.98   | 2.96    | 0.01     |
| Al <sup>IV</sup>               | 0.05    | 0.05   | 0.03   | 0.03    | 0.02   | 0.04    | 0.01     |
| $\Sigma$                       | 3.00    | 3.00   | 3.00   | 3.00    | 3.00   | 3.00    | 0.00     |
| Al <sup>VI</sup>               | 1.99    | 1.98   | 1.98   | 1.99    | 1.97   | 1.98    | 0.01     |
| Cr                             | 0.00    | 0.00   | 0.00   | 0.00    | 0.00   | 0.00    | 0.00     |
| Fe <sup>3+</sup> rec           | 0.01    | 0.02   | 0.02   | 0.01    | 0.03   | 0.02    | 0.00     |
| Ti                             | 0.00    | 0.00   | 0.00   | 0.00    | 0.00   | 0.00    | 0.00     |
| $\Sigma$                       | 2.00    | 2.00   | 2.00   | 2.00    | 2.00   | 2.00    | 0.00     |
| Fe <sup>2+</sup> rec           | 1.72    | 1.72   | 1.68   | 1.69    | 1.72   | 1.71    | 0.02     |
| Mn                             | 0.07    | 0.07   | 0.08   | 0.07    | 0.08   | 0.07    | 0.01     |
| Mg                             | 1.07    | 1.07   | 1.09   | 1.08    | 1.04   | 1.07    | 0.02     |
| Ca                             | 0.16    | 0.16   | 0.17   | 0.16    | 0.17   | 0.17    | 0.00     |
| $\Sigma$                       | 3.02    | 3.02   | 3.02   | 3.00    | 3.01   | 3.01    | 0.01     |
| X <sub>almandine</sub>         | 0.57    | 0.57   | 0.56   | 0.56    | 0.56   | 0.57    | 0.01     |
| X <sub>spessartine</sub>       | 0.02    | 0.02   | 0.03   | 0.02    | 0.03   | 0.02    | 0.00     |
| X <sub>pyrope</sub>            | 0.35    | 0.35   | 0.36   | 0.36    | 0.34   | 0.36    | 0.01     |
| X <sub>grossular</sub>         | 0.05    | 0.05   | 0.06   | 0.06    | 0.06   | 0.05    | 0.00     |
| X <sub>Fe2+</sub>              | 0.62    | 0.62   | 0.61   | 0.61    | 0.63   | 0.62    | 0.01     |

### G3

| wt%                            | 47 core | 47 rim | 36 rim | 7      | 8 core | 9 core | 10 rim | 20 rim | 49    | average | $\sigma$ |
|--------------------------------|---------|--------|--------|--------|--------|--------|--------|--------|-------|---------|----------|
| SiO <sub>2</sub>               | 38.00   | 38.07  | 38.40  | 38.26  | 38.00  | 37.47  | 37.73  | 38.14  | 38.62 | 38.08   | 0.34     |
| TiO <sub>2</sub>               | 0.03    | 0.02   | 0.03   | 0.00   | 0.04   | 0.03   | 0.02   | 0.01   | 0.04  | 0.02    | 0.01     |
| Cr <sub>2</sub> O <sub>3</sub> | 0.00    | 0.03   | 0.04   | 0.02   | 0.01   | 0.04   | 0.05   | 0.00   | 0.00  | 0.02    | 0.02     |
| Al <sub>2</sub> O <sub>3</sub> | 22.08   | 22.22  | 21.72  | 22.12  | 21.63  | 21.69  | 22.13  | 21.93  | 21.55 | 21.90   | 0.25     |
| FeO                            | 28.95   | 28.80  | 29.4   | 29.81  | 29.66  | 29.99  | 29.55  | 29.81  | 28.33 | 29.37   | 0.56     |
| MnO                            | 0.72    | 0.75   | 0.80   | 0.68   | 0.71   | 0.69   | 0.70   | 0.67   | 0.50  | 0.69    | 0.08     |
| MgO                            | 8.10    | 7.95   | 8.24   | 8.40   | 8.67   | 8.68   | 8.33   | 8.41   | 8.23  | 8.33    | 0.24     |
| CaO                            | 1.82    | 2.17   | 2.28   | 2.34   | 1.81   | 1.83   | 2.17   | 2.37   | 2.30  | 2.12    | 0.24     |
| $\Sigma$                       | 99.67   | 100.00 | 100.91 | 101.63 | 100.49 | 100.42 | 100.68 | 101.34 | 99.57 | 100.52  | 0.71     |
| Si                             | 2.96    | 2.96   | 2.97   | 2.94   | 2.95   | 2.92   | 2.93   | 2.94   | 3.00  | 2.95    | 0.03     |
| Al <sup>IV</sup>               | 0.04    | 0.04   | 0.03   | 0.06   | 0.05   | 0.08   | 0.07   | 0.06   | 0.00  | 0.05    | 0.03     |
| $\Sigma$                       | 3.00    | 3.00   | 3.00   | 3.00   | 3.00   | 3.00   | 3.00   | 3.00   | 3.00  | 3.00    | 0.00     |
| Al <sup>VI</sup>               | 1.99    | 2.00   | 1.97   | 1.94   | 1.93   | 1.91   | 1.95   | 1.93   | 1.98  | 1.95    | 0.03     |
| Cr                             | 0.00    | 0.00   | 0.00   | 0.00   | 0.00   | 0.00   | 0.00   | 0.00   | 0.00  | 0.00    | 0.00     |
| Fe <sup>3+</sup> rec           | 0.01    | 0.00   | 0.03   | 0.06   | 0.07   | 0.09   | 0.05   | 0.07   | 0.02  | 0.05    | 0.03     |
| Ti                             | 0.00    | 0.00   | 0.00   | 0.00   | 0.00   | 0.00   | 0.00   | 0.00   | 0.00  | 0.00    | 0.00     |
| $\Sigma$                       | 2.00    | 2.00   | 2.00   | 2.00   | 2.00   | 2.00   | 2.00   | 2.00   | 2.00  | 2.00    | 0.00     |
| Fe <sup>2+</sup> rec           | 1.88    | 1.87   | 1.85   | 1.86   | 1.86   | 1.87   | 1.87   | 1.86   | 1.82  | 1.86    | 0.02     |
| Mn                             | 0.06    | 0.05   | 0.05   | 0.04   | 0.05   | 0.05   | 0.05   | 0.04   | 0.03  | 0.05    | 0.01     |
| Mg                             | 0.94    | 0.92   | 0.95   | 0.96   | 1.00   | 1.01   | 0.96   | 0.97   | 0.95  | 0.96    | 0.03     |
| Ca                             | 0.15    | 0.18   | 0.19   | 0.19   | 0.15   | 0.15   | 0.18   | 0.2    | 0.19  | 0.18    | 0.02     |
| $\Sigma$                       | 3.02    | 3.02   | 3.04   | 3.06   | 3.06   | 3.08   | 3.06   | 3.06   | 3.00  | 3.04    | 0.02     |
| X <sub>almandine</sub>         | 0.62    | 0.62   | 0.61   | 0.61   | 0.61   | 0.61   | 0.61   | 0.61   | 0.61  | 0.61    | 0.01     |
| X <sub>spessartine</sub>       | 0.02    | 0.02   | 0.02   | 0.01   | 0.02   | 0.02   | 0.02   | 0.01   | 0.01  | 0.02    | 0.00     |
| X <sub>pyrope</sub>            | 0.31    | 0.30   | 0.31   | 0.31   | 0.33   | 0.33   | 0.31   | 0.32   | 0.32  | 0.32    | 0.01     |
| X <sub>grossular</sub>         | 0.05    | 0.06   | 0.06   | 0.06   | 0.05   | 0.05   | 0.06   | 0.07   | 0.06  | 0.06    | 0.01     |
| X <sub>Fe2+</sub>              | 0.67    | 0.67   | 0.66   | 0.66   | 0.65   | 0.65   | 0.66   | 0.66   | 0.66  | 0.66    | 0.01     |

| G4                             |         |        |        |       |        |         |          |
|--------------------------------|---------|--------|--------|-------|--------|---------|----------|
| wt%                            | 56 core | 56 rim | 69     | 70    | 71     | average | $\sigma$ |
| SiO <sub>2</sub>               | 37.90   | 38.15  | 39.52  | 39.72 | 39.6   | 38.98   | 0.88     |
| TiO <sub>2</sub>               | 0.02    | 0.01   | 0.03   | 0.05  | 0.02   | 0.03    | 0.02     |
| Cr <sub>2</sub> O <sub>3</sub> | 0.03    | 0.00   | 0.00   | 0.00  | 0.00   | 0.01    | 0.01     |
| Al <sub>2</sub> O <sub>3</sub> | 22.50   | 22.23  | 22.07  | 22.21 | 22.18  | 22.24   | 0.16     |
| FeO                            | 26.32   | 26.45  | 26.24  | 26.5  | 26.17  | 26.34   | 0.14     |
| MnO                            | 0.82    | 0.85   | 0.78   | 0.80  | 0.74   | 0.80    | 0.04     |
| MgO                            | 9.67    | 9.97   | 9.91   | 9.95  | 9.91   | 9.88    | 0.12     |
| CaO                            | 1.98    | 1.91   | 2.14   | 2.17  | 2.21   | 2.08    | 0.13     |
| $\Sigma$                       | 99.24   | 99.57  | 100.69 | 101.4 | 100.83 | 100.35  | 0.91     |
| Si                             | 2.94    | 2.95   | 3.00   | 3     | 3.01   | 2.98    | 0.04     |
| Al <sup>IV</sup>               | 0.06    | 0.05   | 0.00   | 0.00  | 0.00   | 0.02    | 0.03     |
| $\Sigma$                       | 3.00    | 3.00   | 3.00   | 3.00  | 3.00   | 3.00    | 0.00     |
| Al <sup>VI</sup>               | 1.99    | 1.97   | 1.98   | 1.98  | 1.99   | 1.98    | 0.01     |
| Cr                             | 0.00    | 0.00   | 0.00   | 0.00  | 0.00   | 0.00    | 0.00     |
| Fe <sup>3+</sup> rec           | 0.01    | 0.03   | 0.02   | 0.02  | 0.01   | 0.02    | 0.01     |
| Ti                             | 0.00    | 0.00   | 0.00   | 0.00  | 0.00   | 0.00    | 0.00     |
| $\Sigma$                       | 2.00    | 2.00   | 2.00   | 2.00  | 2.00   | 2.00    | 0.00     |
| Fe <sup>2+</sup> rec           | 1.70    | 1.68   | 1.65   | 1.66  | 1.65   | 1.67    | 0.02     |
| Mn                             | 0.05    | 0.06   | 0.05   | 0.05  | 0.05   | 0.05    | 0.00     |
| Mg                             | 1.12    | 1.15   | 1.12   | 1.12  | 1.12   | 1.13    | 0.01     |
| Ca                             | 0.16    | 0.16   | 0.17   | 0.19  | 0.18   | 0.17    | 0.01     |
| $\Sigma$                       | 3.03    | 3.04   | 2.98   | 2.99  | 2.98   | 3.01    | 0.03     |
| X <sub>almandine</sub>         | 0.56    | 0.55   | 0.55   | 0.56  | 0.55   | 0.56    | 0.00     |
| X <sub>spessartine</sub>       | 0.02    | 0.02   | 0.02   | 0.02  | 0.02   | 0.02    | 0.00     |
| X <sub>pyrope</sub>            | 0.37    | 0.38   | 0.38   | 0.38  | 0.38   | 0.38    | 0.00     |
| X <sub>grossular</sub>         | 0.05    | 0.05   | 0.05   | 0.05  | 0.06   | 0.05    | 0.00     |
| X <sub>Fe2+</sub>              | 0.60    | 0.59   | 0.60   | 0.60  | 0.60   | 0.60    | 0.00     |

| TAF500                         |        |        |        |        |        |       |       |         |        |         |          |
|--------------------------------|--------|--------|--------|--------|--------|-------|-------|---------|--------|---------|----------|
| wt%                            | 1 core | 16 rim | 44     | 1 core | 2 core | 3 rim | 4 rim | 64 core | 65 rim | average | $\sigma$ |
| SiO <sub>2</sub>               | 39.97  | 39.48  | 39.69  | 38.37  | 38.75  | 38.31 | 38.36 | 39.81   | 39.30  | 39.12   | 0.67     |
| TiO <sub>2</sub>               | 0.01   | 0.03   | 0.02   | 0.02   | 0.02   | 0.04  | 0.00  | 0.00    | 0.02   | 0.02    | 0.03     |
| Cr <sub>2</sub> O <sub>3</sub> | 0.02   | 0.03   | 0.01   | 0.04   | 0.03   | 0.02  | 0.04  | 0.01    | 0.04   | 0.03    | 0.01     |
| Al <sub>2</sub> O <sub>3</sub> | 23.15  | 22.87  | 22.53  | 22.53  | 22.57  | 22.42 | 22.57 | 22.56   | 22.4   | 22.62   | 0.24     |
| FeO                            | 24.52  | 25.00  | 24.67  | 24.57  | 24.52  | 24.53 | 24.87 | 24.75   | 24.63  | 24.68   | 0.17     |
| MnO                            | 0.79   | 0.80   | 0.78   | 0.79   | 0.76   | 0.78  | 0.80  | 0.84    | 0.80   | 0.79    | 0.02     |
| MgO                            | 11.05  | 11.04  | 11.11  | 10.98  | 11.08  | 11.01 | 10.93 | 11.26   | 10.96  | 11.05   | 0.10     |
| CaO                            | 2.00   | 2.10   | 1.93   | 1.99   | 1.98   | 1.91  | 1.92  | 2.05    | 2.02   | 1.99    | 0.06     |
| $\Sigma$                       | 101.51 | 101.35 | 100.74 | 99.29  | 99.70  | 99.02 | 99.49 | 101.28  | 100.17 | 100.28  | 0.96     |
| Si                             | 2.99   | 2.97   | 2.99   | 2.94   | 2.96   | 2.95  | 2.94  | 2.99    | 2.98   | 2.97    | 0.02     |
| Al <sup>IV</sup>               | 0.01   | 0.03   | 0.01   | 0.06   | 0.04   | 0.05  | 0.06  | 0.01    | 0.02   | 0.03    | 0.02     |
| $\Sigma$                       | 3.00   | 3.00   | 3.00   | 3.00   | 3.00   | 3.00  | 3.00  | 3.00    | 3.00   | 3.00    | 0.00     |
| Al <sup>VI</sup>               | 2.03   | 2.00   | 1.99   | 1.98   | 1.99   | 1.98  | 1.98  | 1.99    | 1.99   | 1.99    | 0.02     |
| Cr                             | 0.00   | 0.00   | 0.00   | 0.00   | 0.00   | 0.00  | 0.00  | 0.00    | 0.00   | 0.00    | 0.00     |
| Fe <sup>3+</sup> rec           | 0.00   | 0.00   | 0.01   | 0.02   | 0.01   | 0.02  | 0.02  | 0.01    | 0.01   | 0.01    | 0.01     |
| Ti                             | 0.00   | 0.00   | 0.00   | 0.00   | 0.00   | 0.00  | 0.00  | 0.00    | 0.00   | 0.00    | 0.00     |
| $\Sigma$                       | 2.03   | 2.00   | 2.00   | 2.00   | 2.00   | 2.00  | 2.00  | 2.00    | 2.00   | 2.00    | 0.00     |
| Fe <sup>2+</sup> rec           | 1.53   | 1.57   | 1.55   | 1.56   | 1.56   | 1.56  | 1.58  | 1.54    | 1.55   | 1.56    | 0.02     |
| Mn                             | 0.05   | 0.05   | 0.05   | 0.05   | 0.05   | 0.05  | 0.05  | 0.05    | 0.05   | 0.05    | 0.00     |
| Mg                             | 1.23   | 1.24   | 1.25   | 1.26   | 1.26   | 1.26  | 1.25  | 1.26    | 1.24   | 1.25    | 0.01     |
| Ca                             | 0.16   | 0.17   | 0.16   | 0.16   | 0.16   | 0.16  | 0.16  | 0.16    | 0.16   | 0.16    | 0.00     |
| $\Sigma$                       | 2.97   | 3.03   | 3.01   | 3.05   | 3.04   | 3.05  | 3.05  | 3.03    | 3.02   | 3.03    | 0.03     |
| X <sub>almandine</sub>         | 0.52   | 0.52   | 0.51   | 0.51   | 0.51   | 0.51  | 0.52  | 0.51    | 0.52   | 0.52    | 0.00     |
| X <sub>spessartine</sub>       | 0.02   | 0.02   | 0.02   | 0.02   | 0.02   | 0.02  | 0.02  | 0.02    | 0.02   | 0.02    | 0.00     |
| X <sub>pyrope</sub>            | 0.41   | 0.41   | 0.42   | 0.42   | 0.42   | 0.42  | 0.41  | 0.42    | 0.41   | 0.41    | 0.00     |
| X <sub>grossular</sub>         | 0.05   | 0.06   | 0.05   | 0.05   | 0.05   | 0.05  | 0.05  | 0.05    | 0.05   | 0.05    | 0.00     |
| X <sub>Fe2+</sub>              | 0.55   | 0.56   | 0.55   | 0.55   | 0.55   | 0.55  | 0.56  | 0.55    | 0.56   | 0.56    | 0.00     |

| TAF501                         |        |        |        |         |        |        |         |        |         |       |         |          |
|--------------------------------|--------|--------|--------|---------|--------|--------|---------|--------|---------|-------|---------|----------|
| wt%                            | 22 rim | 23 rim | 33 rim | 35 core | 35 rim | 77     | 75 core | 19 rim | 19 core | 1     | average | $\sigma$ |
| SiO <sub>2</sub>               | 39.51  | 38.85  | 39.25  | 38.38   | 38.44  | 39.15  | 39.28   | 39.25  | 39.14   | 39.49 | 39.07   | 0.40     |
| TiO <sub>2</sub>               | 0.01   | 0.00   | 0.02   | 0.01    | 0.03   | 0.02   | 0.03    | 0.02   | 0.03    | 0.03  | 0.02    | 0.01     |
| Cr <sub>2</sub> O <sub>3</sub> | 0.02   | 0.00   | 0.00   | 0.02    | 0.02   | 0.04   | 0.03    | 0.03   | 0.02    | 0.00  | 0.02    | 0.01     |
| Al <sub>2</sub> O <sub>3</sub> | 22.92  | 22.92  | 22.8   | 22.42   | 22.56  | 22.35  | 22.39   | 22.42  | 22.40   | 22.24 | 22.54   | 0.25     |
| FeO                            | 26.59  | 27.56  | 28.4   | 26.54   | 26.65  | 26.49  | 26.79   | 26.08  | 26.30   | 26.93 | 26.83   | 0.68     |
| MnO                            | 0.79   | 0.75   | 0.72   | 0.77    | 0.78   | 0.78   | 0.75    | 0.8    | 0.78    | 0.73  | 0.77    | 0.03     |
| MgO                            | 9.75   | 9.45   | 9.34   | 9.78    | 9.63   | 9.92   | 9.55    | 9.88   | 9.95    | 9.87  | 9.71    | 0.21     |
| CaO                            | 2.34   | 2.29   | 1.36   | 2.20    | 2.21   | 2.19   | 2.18    | 2.1    | 2.24    | 2.31  | 2.14    | 0.28     |
| $\Sigma$                       | 101.93 | 101.82 | 101.89 | 100.11  | 100.32 | 100.94 | 101.00  | 100.58 | 100.86  | 101.6 | 101.11  | 0.67     |
| Si                             | 2.97   | 2.94   | 2.97   | 2.95    | 2.94   | 2.98   | 2.99    | 2.99   | 2.98    | 2.99  | 2.97    | 0.02     |
| Al <sup>IV</sup>               | 0.03   | 0.06   | 0.03   | 0.05    | 0.06   | 0.02   | 0.01    | 0.01   | 0.02    | 0.01  | 0.03    | 0.02     |
| $\Sigma$                       | 3.00   | 3.00   | 3.00   | 3.00    | 3.00   | 3.00   | 3.00    | 3.00   | 3.00    | 3.00  | 3.00    | 0.00     |
| Al <sup>VI</sup>               | 2.00   | 1.99   | 2.00   | 1.98    | 1.98   | 1.99   | 2.00    | 2.01   | 1.99    | 1.97  | 1.99    | 0.01     |
| Cr                             | 0.00   | 0.00   | 0.00   | 0.00    | 0.00   | 0.00   | 0.00    | 0.00   | 0.00    | 0.00  | 0.00    | 0.00     |
| Fe <sup>3+</sup> rec           | 0.00   | 0.01   | 0.00   | 0.02    | 0.02   | 0.01   | 0.00    | 0.00   | 0.01    | 0.03  | 0.01    | 0.01     |
| Ti                             | 0.00   | 0.00   | 0.00   | 0.00    | 0.00   | 0.00   | 0.00    | 0.00   | 0.00    | 0.00  | 0.00    | 0.00     |
| $\Sigma$                       | 2.00   | 2.00   | 2.00   | 2.00    | 2.00   | 2.00   | 2.00    | 2.01   | 2.00    | 2.00  | 2.00    | 0.02     |
| Fe <sup>2+</sup> rec           | 1.67   | 1.74   | 1.80   | 1.69    | 1.69   | 1.67   | 1.70    | 1.66   | 1.66    | 1.67  | 1.70    | 0.04     |
| Mn                             | 0.05   | 0.05   | 0.05   | 0.05    | 0.05   | 0.05   | 0.05    | 0.05   | 0.05    | 0.05  | 0.05    | 0.05     |
| Mg                             | 1.09   | 1.07   | 1.05   | 1.12    | 1.10   | 1.12   | 1.08    | 1.12   | 1.13    | 1.11  | 1.10    | 0.03     |
| Ca                             | 0.19   | 0.19   | 0.11   | 0.18    | 0.18   | 0.18   | 0.18    | 0.17   | 0.18    | 0.19  | 0.18    | 0.02     |
| $\Sigma$                       | 3.00   | 3.05   | 3.01   | 3.04    | 3.02   | 3.02   | 3.01    | 3.00   | 3.02    | 3.02  | 3.02    | 0.02     |
| X <sub>almandine</sub>         | 0.56   | 0.57   | 0.60   | 0.56    | 0.56   | 0.56   | 0.57    | 0.55   | 0.55    | 0.56  | 0.56    | 0.01     |
| X <sub>spessartine</sub>       | 0.02   | 0.02   | 0.02   | 0.02    | 0.02   | 0.02   | 0.02    | 0.02   | 0.02    | 0.02  | 0.02    | 0.00     |
| X <sub>pyrope</sub>            | 0.36   | 0.35   | 0.35   | 0.37    | 0.36   | 0.37   | 0.36    | 0.37   | 0.37    | 0.37  | 0.36    | 0.01     |
| X <sub>grossular</sub>         | 0.06   | 0.06   | 0.04   | 0.06    | 0.06   | 0.06   | 0.06    | 0.06   | 0.06    | 0.06  | 0.06    | 0.01     |
| X <sub>Fe2+</sub>              | 0.61   | 0.62   | 0.63   | 0.60    | 0.61   | 0.60   | 0.61    | 0.60   | 0.60    | 0.61  | 0.61    | 0.01     |
