# Supplementary material for: Post-Hercynian ultrahigh-temperature tectono-metamorphic evolution of the Middle Atlas lower crust (central Morocco) revealed by metapelitic granulite xenoliths
Source: Copernicus journal article supplement (doi:10.5194/se-16-1-2025), 2025-01-03
Supplement: Supplementary file 16 [file se-16-1-2025-supplement.zip]

**Table S1 - Sillimanite**

| Wt%                            | G2     |       |       |       |       |         |          | G3    |       |        |         |          |
|--------------------------------|--------|-------|-------|-------|-------|---------|----------|-------|-------|--------|---------|----------|
|                                | 11     | 24    | 32    | 34    | 38    | average | $\sigma$ | 39    | 41    | 42     | average | $\sigma$ |
| SiO <sub>2</sub>               | 36.92  | 36.89 | 36.88 | 36.9  | 36.96 | 36.91   | 0.03     | 36.41 | 37.25 | 36.72  | 36.79   | 0.42     |
| TiO <sub>2</sub>               | 0.01   | 0.00  | 0.00  | 0.02  | 0.03  | 0.01    | 0.01     | 0.02  | 0.01  | 0.01   | 0.01    | 0.01     |
| Cr <sub>2</sub> O <sub>3</sub> | 0      | 0.03  | 0     | 0     | 0     | 0.01    | 0.01     | 0.08  | 0.00  | 0.00   | 0.03    | 0.05     |
| Al <sub>2</sub> O <sub>3</sub> | 61.71  | 61.5  | 61.56 | 61.66 | 61.62 | 61.61   | 0.08     | 61.16 | 61.57 | 63.22  | 61.98   | 1.09     |
| FeO T                          | 1.37   | 1.23  | 1.06  | 1.11  | 1.21  | 1.20    | 0.12     | 1.00  | 0.91  | 1.1    | 1.00    | 0.10     |
| MnO                            | 0.01   | 0     | 0     | 0     | 0     | 0       | 0        | 0.02  | 0     | 0      | 0.01    | 0.01     |
| MgO                            | 0.02   | 0.01  | 0.04  | 0.03  | 0.02  | 0.02    | 0.01     | 0     | 0.03  | 0.02   | 0.02    | 0.02     |
| $\Sigma$                       | 100.04 | 99.66 | 99.54 | 99.72 | 99.84 | 99.76   | 0.19     | 98.69 | 99.77 | 101.07 | 99.84   | 1.19     |

| Wt%                            | G4    |       | TAF 500 |       |       |        |        |        |  |  | average | $\sigma$ |
|--------------------------------|-------|-------|---------|-------|-------|--------|--------|--------|--|--|---------|----------|
|                                | 73    | 74    | 12      | 5     | 16    | 14     | 4      | 66     |  |  |         |          |
| SiO <sub>2</sub>               | 36.85 | 36.58 | 35.78   | 35.37 | 36.77 | 36.53  | 37.00  | 36.72  |  |  | 36.36   | 0.64     |
| TiO <sub>2</sub>               | 0.01  | 0     | 0.01    | 0     | 0.02  | 0      | 0      | 0.01   |  |  | 0.01    | 0.01     |
| Cr <sub>2</sub> O <sub>3</sub> | 0     | 0     | 0.05    | 0.06  | 0     | 0.07   | 0.05   | 0.05   |  |  | 0.05    | 0.02     |
| Al <sub>2</sub> O <sub>3</sub> | 61.52 | 61.38 | 62.36   | 62.27 | 61.08 | 63.31  | 63.62  | 62.75  |  |  | 62.57   | 0.90     |
| FeO T                          | 1.16  | 1.12  | 1.07    | 1.10  | 1.03  | 1.06   | 1.08   | 1.21   |  |  | 1.09    | 0.06     |
| MnO                            | 0     | 0.01  | 0.01    | 0     | 0     | 0.01   | 0      | 0.02   |  |  | 0.01    | 0.01     |
| MgO                            | 0     | 0     | 0.03    | 0.03  | 0.04  | 0.04   | 0.03   | 0.02   |  |  | 0.02    | 0.01     |
| $\Sigma$                       | 99.54 | 99.09 | 99.30   | 98.82 | 98.94 | 101.02 | 101.78 | 100.78 |  |  | 100.11  | 1.25     |
