# Supplementary material for: Post-Hercynian ultrahigh-temperature tectono-metamorphic evolution of the Middle Atlas lower crust (central Morocco) revealed by metapelitic granulite xenoliths
Source: Copernicus journal article supplement (doi:10.5194/se-16-1-2025), 2025-01-03
Supplement: Supplementary file 17 [file se-16-1-2025-supplement.zip]

Table S10 - Corundum

| TAF500  |                  |                  |                                |                                |      |     |      |      |                   |                  |       |
|---------|------------------|------------------|--------------------------------|--------------------------------|------|-----|------|------|-------------------|------------------|-------|
| wt%     | SiO <sub>2</sub> | TiO <sub>2</sub> | Cr <sub>2</sub> O <sub>3</sub> | Al <sub>2</sub> O <sub>3</sub> | FeO  | MnO | MgO  | CaO  | Na <sub>2</sub> O | K <sub>2</sub> O | Σ     |
| 1       | 0.01             | 0.03             | 0                              | 98.35                          | 1.09 | 0   | 0.01 | 0.02 | 0                 | 0                | 99.51 |
| 2       | 0.01             | 0.02             | 0                              | 97.88                          | 1.14 | 0   | 0.02 | 0.01 | 0                 | 0                | 99.08 |
| 3       | 0                | 0.03             | 0                              | 98.38                          | 1.07 | 0   | 0    | 0.01 | 0                 | 0                | 99.53 |
| 4       | 0.01             | 0.04             | 0                              | 98.60                          | 1.12 | 0   | 0    | 0    | 0.04              | 0                | 99.82 |
| 5       | 0.01             | 0.05             | 0                              | 98.41                          | 1.12 | 0   | 0.01 | 0.01 | 0                 | 0                | 99.63 |
| 6       | 0.02             | 0.01             | 0                              | 97.84                          | 1.14 | 0   | 0.01 | 0.02 | 0                 | 0                | 99.06 |
| 10      | 0.01             | 0.01             | 0                              | 98.01                          | 0.99 | 0   | 0    | 0    | 0.01              | 0                | 99.03 |
| 11      | 0                | 0.01             | 0                              | 98.40                          | 0.94 | 0   | 0.01 | 0    | 0                 | 0                | 99.37 |
| average | 0.01             | 0.03             |                                | 98.23                          | 1.08 |     | 0.01 | 0.01 | 0.01              |                  | 99.38 |
| σ       | 0.01             | 0.02             |                                | 0.28                           | 0.07 |     | 0.01 | 0.01 | 0.01              |                  | 0.30  |

| SELECTED MEGACRYST         |                                |                  |                  |                   |       |      |       |       |                                |        |      |       |
|----------------------------|--------------------------------|------------------|------------------|-------------------|-------|------|-------|-------|--------------------------------|--------|------|-------|
| wt %                       | Al <sub>2</sub> O <sub>3</sub> | SiO <sub>2</sub> | TiO <sub>2</sub> | Na <sub>2</sub> O | MgO   | MnO  | FeO   | CaO   | Cr <sub>2</sub> O <sub>3</sub> | Σ      |      |       |
| Corundum                   |                                |                  |                  |                   |       |      |       |       |                                |        |      |       |
| rim                        | 97.58                          | 0.13             | 0.05             | 0                 | 0.02  | 0.02 | 1.88  | 0     | 0.06                           | 97.87  |      |       |
| core                       | 97.88                          | 0.10             | 0.08             | 0                 | 0     | 0.01 | 2.11  | 0     | 0.03                           | 100.24 |      |       |
| rim                        | 97.08                          | 0.13             | 0                | 0                 | 0     | 0    | 1.71  | 0     | 0.04                           | 98.90  |      |       |
| average                    | 97.52                          | 0.12             | 0.05             |                   | 0.01  | 0.01 | 1.91  |       | 0.05                           | 99.03  |      |       |
| σ                          | 0.40                           | 0.02             | 0.04             |                   | 0.01  | 0.01 | 0.28  |       | 0.02                           | 1.19   |      |       |
| Ti-Magnetite inclusions    |                                |                  |                  |                   |       |      |       |       |                                |        |      |       |
| 3 / 1                      | 1.80                           | 0.01             | 26.12            | 0.07              | 1.67  | 1.38 | 69.37 | 0.02  | 0.21                           | 100.65 |      |       |
| 7 / 1                      | 1.34                           | 0.13             | 19.89            | 0                 | 0.99  | 0.61 | 71.68 | 0     | 0.13                           | 94.76  |      |       |
| 11 / 1                     | 1.94                           | 0.11             | 15.47            | 0.03              | 1.70  | 0.44 | 74.77 | 0.01  | 0.17                           | 94.64  |      |       |
| 13 / 1                     | 1.75                           | 0.15             | 15.49            | 0                 | 1.67  | 0.48 | 74.87 | 0.02  | 0.18                           | 94.61  |      |       |
| average                    | 1.71                           | 0.10             | 19.24            | 0.03              | 1.51  | 0.72 | 72.67 |       | 0.17                           | 96.16  |      |       |
| σ                          | 0.26                           | 0.06             | 5.03             | 0.03              | 0.34  | 0.44 | 2.65  |       | 0.04                           | 2.99   |      |       |
| Stuck Orthopyroxene        |                                |                  |                  |                   |       |      |       |       |                                |        |      |       |
| 1 / 1                      | 22.30                          | 38.52            | 0                | 0.02              | 9.51  | 0.89 | 27.29 | 2.09  | 0.03                           | 100.65 |      |       |
| 5 / 1                      | 22.54                          | 38.84            | 0                | 0.02              | 9.72  | 0.99 | 27.75 | 2.07  | 0                              | 101.93 |      |       |
| 9 / 1                      | 22.60                          | 38.55            | 0.02             | 0.01              | 10.14 | 0.86 | 26.72 | 1.98  | 0.02                           | 100.91 |      |       |
| average                    | 22.48                          | 38.64            |                  | 0.02              | 9.79  | 0.92 | 27.25 | 2.04  | 0.02                           | 101.17 |      |       |
| σ                          | 0.16                           | 0.18             |                  | 0.01              | 0.32  | 0.01 | 0.52  | 0.06  | 0.01                           | 0.67   |      |       |
| Trace elements in Corundum |                                |                  |                  |                   |       |      |       |       |                                |        |      |       |
| ppm                        | Ti                             | V                | Cr               | Mn                | Co    | Ni   | Zn    | Ga    | Sr                             | Nb     | Sn   | Ta    |
| An1                        | 365.5                          | 88.6             | 230.2            | <8.6              | 2.8   | <5.0 | 7.6   | 348.2 | <0.4                           | <0.02  | <1.3 | 0     |
| An2                        | 486.6                          | 87.7             | 179.1            | <9.2              | 7.6   | <5.3 | <4.8  | 315.1 | <0.5                           | <0.02  | <1.3 | 0     |
| An3                        | 313                            | 87               | 281.1            | <9.7              | 4.5   | <5.8 | <4.7  | 330.7 | <05                            | <0.03  | <1.3 | <0.01 |
| An4                        | 670.8                          | 91.3             | 93.6             | <7.2              | 2.7   | <4.3 | 5.47  | 305.7 | <0.4                           | <0.03  | <1.0 | 0     |
| average                    | 459                            | 89               | 196              |                   | 4     |      |       | 325   |                                |        |      |       |
| σ                          | 159                            | 2                | 80               |                   | 2     |      |       | 19    |                                |        |      |       |
