# Supplementary material for: Post-Hercynian ultrahigh-temperature tectono-metamorphic evolution of the Middle Atlas lower crust (central Morocco) revealed by metapelitic granulite xenoliths
Source: Copernicus journal article supplement (doi:10.5194/se-16-1-2025), 2025-01-03
Supplement: Supplementary file 21 [file se-16-1-2025-supplement.zip]

Table S8 - Glass

| Glass                          | G2    |       |         |          | G3    |       |       |         |          | G4    |       |       |         |          |
|--------------------------------|-------|-------|---------|----------|-------|-------|-------|---------|----------|-------|-------|-------|---------|----------|
|                                | 35    | 37    | average | $\sigma$ | 26    | 30    | 58    | average | $\sigma$ | 7     | 15    | 21    | average | $\sigma$ |
| SiO <sub>2</sub>               | 64.65 | 62.46 | 63.56   | 1.55     | 56.99 | 56.77 | 55.02 | 56.26   | 1.08     | 54.69 | 51.3  | 53.27 | 53.09   | 1.70     |
| TiO <sub>2</sub>               | 0.41  | 0.67  | 0.54    | 0.18     | 1.75  | 1.29  | 0.86  | 1.30    | 0.45     | 0.11  | 1.6   | 1.40  | 1.04    | 0.81     |
| Cr <sub>2</sub> O <sub>3</sub> | 0.03  | 0.02  | 0.03    | 0.01     | 0     | 0     | 0     |         |          | 0     | 0     | 0     |         |          |
| Al <sub>2</sub> O <sub>3</sub> | 15.43 | 14.39 | 14.91   | 0.74     | 15.24 | 14.44 | 17.15 | 15.61   | 1.39     | 17.31 | 16.09 | 16.33 | 16.58   | 0.65     |
| FeO                            | 9.04  | 11.47 | 10.26   | 1.72     | 12.95 | 14.46 | 14.06 | 13.82   | 0.78     | 16.99 | 18.3  | 16.62 | 17.30   | 0.88     |
| MnO                            | 0.49  | 0.57  | 0.53    | 0.06     | 0.39  | 0.52  | 0.43  | 0.45    | 0.07     | 0.80  | 1.06  | 0.84  | 0.90    | 0.14     |
| MgO                            | 1.16  | 1.35  | 1.26    | 0.13     | 1.5   | 2.31  | 1.19  | 1.67    | 0.58     | 1.63  | 1.61  | 1.08  | 1.44    | 0.31     |
| CaO                            | 0.58  | 0.43  | 0.505   | 0.11     | 5.02  | 2.44  | 7.13  | 4.86    | 2.35     | 6.29  | 6.24  | 6.84  | 6.46    | 0.33     |
| Na <sub>2</sub> O              | 2.78  | 2.94  | 2.86    | 0.11     | 1.22  | 0.70  | 1.10  | 1.01    | 0.27     | 0.38  | 0.04  | 0.07  | 0.16    | 0.19     |
| K <sub>2</sub> O               | 3.78  | 3.24  | 3.51    | 0.38     | 1.37  | 2.75  | 0.20  | 1.44    | 1.28     | 0.21  | 0.35  | 0.47  | 0.34    | 0.13     |
| $\Sigma$                       | 98.35 | 97.54 | 97.95   | 0.57     | 96.43 | 95.72 | 99.13 | 97.09   | 1.80     | 98.41 | 96.59 | 96.92 | 97.31   | 0.97     |

| TAF500 |       |       |       |       |         |          | TAF501 |       |       |       |       |       |       |         |          |
|--------|-------|-------|-------|-------|---------|----------|--------|-------|-------|-------|-------|-------|-------|---------|----------|
| 8      | 10    | 10'   | 11    | 69    | average | $\sigma$ | 21     | 19    | 28    | 31    | 38    | 39    | 44    | average | $\sigma$ |
| 49.60  | 45.91 | 48.72 | 46.73 | 47.99 | 47.79   | 1.49     | 53.3   | 51.16 | 50.67 | 55.34 | 53.17 | 51.80 | 46.61 | 51.72   | 2.75     |
| 3.09   | 3.53  | 3.63  | 3.79  | 4.04  | 3.62    | 0.35     | 0.64   | 1.47  | 0.67  | 0.99  | 2.75  | 2.60  | 2.99  | 1.73    | 1.03     |
| 0      | 0     | 0.01  | 0     | 0.01  | 0       | 0.01     | 0.02   | 0.03  | 0     | 0.02  | 0     | 0     | 0     | 0.01    | 0.01     |
| 16.76  | 15.07 | 17.76 | 15.93 | 16.44 | 16.39   | 1.00     | 16.17  | 16.5  | 15.49 | 16.68 | 15.87 | 15.68 | 16.14 | 16.08   | 0.43     |
| 17.48  | 17.04 | 18.86 | 19.48 | 19.65 | 18.50   | 1.18     | 20.14  | 21.08 | 22.71 | 18.71 | 17.87 | 19.34 | 21.46 | 20.19   | 1.69     |
| 0.87   | 0.79  | 0.84  | 0.79  | 0.72  | 0.80    | 0.06     | 0.72   | 0.74  | 0.74  | 0.6   | 0.66  | 0.70  | 0.65  | 0.69    | 0.05     |
| 1.93   | 2.89  | 2.62  | 4.19  | 3.62  | 3.05    | 0.88     | 2.94   | 2.04  | 4.4   | 2.18  | 2.86  | 2.81  | 2.31  | 2.79    | 0.79     |
| 6.44   | 5.30  | 6.22  | 5.17  | 5.65  | 5.76    | 0.56     | 4.72   | 5.94  | 2.12  | 3.4   | 5.08  | 5.27  | 6.90  | 4.78    | 1.59     |
| 0.11   | 0.10  | 0.02  | 0.05  | 0.07  | 0.07    | 0.04     | 0.44   | 0.10  | 0.59  | 1.27  | 0.51  | 0.67  | 0.02  | 0.51    | 0.41     |
| 0.10   | 0.19  | 0.07  | 0.08  | 0.08  | 0.11    | 0.05     | 0.07   | 0.06  | 0.11  | 0.25  | 0.29  | 0.20  | 0.01  | 0.14    | 0.11     |
| 96.39  | 90.83 | 98.75 | 96.21 | 98.27 | 96.10   | 3.15     | 99.16  | 99.11 | 97.50 | 99.44 | 99.07 | 99.27 | 97.09 | 98.66   | 0.95     |
