# Supplementary material for: Post-Hercynian ultrahigh-temperature tectono-metamorphic evolution of the Middle Atlas lower crust (central Morocco) revealed by metapelitic granulite xenoliths
Source: Copernicus journal article supplement (doi:10.5194/se-16-1-2025), 2025-01-03
Supplement: Supplementary file 22 [file se-16-1-2025-supplement.zip]

**Table S3 - Osumilite**

| wt%                            | G3    |       |        |         |          |
|--------------------------------|-------|-------|--------|---------|----------|
|                                | 41    | 43    | 44     | average | $\sigma$ |
| SiO <sub>2</sub>               | 41.05 | 51.6  | 45.63  | 46.09   | 5.29     |
| TiO <sub>2</sub>               | 0.35  | 0.45  | 0.63   | 0.48    | 0.14     |
| Cr <sub>2</sub> O <sub>3</sub> | 0.02  | 0.01  | 0.02   | 0.02    | 0.01     |
| Al <sub>2</sub> O <sub>3</sub> | 23.49 | 20.01 | 24.51  | 22.67   | 2.36     |
| FeO                            | 22.84 | 18.87 | 20.2   | 20.64   | 2.02     |
| MnO                            | 0.49  | 0.52  | 0.43   | 0.48    | 0.05     |
| MgO                            | 4.28  | 1.85  | 3.81   | 3.31    | 1.29     |
| Na <sub>2</sub> O              | 1.05  | 1.58  | 1.22   | 1.28    | 0.27     |
| CaO                            | 2.00  | 3.73  | 2.59   | 2.77    | 0.88     |
| K <sub>2</sub> O               | 1.29  | 1.31  | 1.41   | 1.34    | 0.06     |
| $\Sigma$                       | 96.86 | 99.93 | 100.45 | 99.08   | 1.94     |
| Si                             | 7.99  | 9.40  | 8.38   | 8.5     | 0.73     |
| Ti                             | 0.05  | 0.06  | 0.09   | 0.07    | 0.02     |
| Cr                             | 0.00  | 0.00  | 0.00   | 0.00    | 0.00     |
| Al <sup>IV</sup>               | 3.95  | 2.53  | 3.53   | 3.34    | 0.73     |
| $\Sigma$                       | 12.00 | 12.00 | 12.00  | 12.00   | 0.00     |
| Al <sup>VI</sup>               | 1.44  | 1.77  | 1.78   | 1.66    | 0.19     |
| Fe                             | 3.72  | 2.88  | 3.10   | 3.23    | 0.44     |
| Mn                             | 0.08  | 0.08  | 0.07   | 0.08    | 0.01     |
| Mg                             | 1.24  | 0.50  | 1.04   | 0.93    | 0.38     |
| $\Sigma$                       | 6.48  | 5.23  | 5.99   | 5.90    | 0.63     |
| Na                             | 0.40  | 0.56  | 0.43   | 0.46    | 0.09     |
| Ca                             | 0.42  | 0.73  | 0.51   | 0.55    | 0.16     |
| K                              | 0.32  | 0.31  | 0.33   | 0.32    | 0.01     |
| $\Sigma$                       | 1.13  | 1.59  | 1.27   | 1.33    | 0.23     |
| X <sub>Fe</sub>                | 0.75  | 0.85  | 0.75   | 0.78    | 0.06     |
