# Supplementary material for: Post-Hercynian ultrahigh-temperature tectono-metamorphic evolution of the Middle Atlas lower crust (central Morocco) revealed by metapelitic granulite xenoliths
Source: Copernicus journal article supplement (doi:10.5194/se-16-1-2025), 2025-01-03
Supplement: Supplementary file 23 [file se-16-1-2025-supplement.zip]

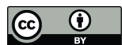

## *Supplement of*

# **Post-Hercynian ultrahigh-temperature tectono-metamorphic evolution of the Middle Atlas lower crust (central Morocco) revealed by metapelitic granulite xenoliths**

**Abdelkader El Maz et al.**

*Correspondence to:* Abdelkader El Maz ([elmazabdel@yahoo.fr](mailto:elmazabdel@yahoo.fr))

- [se-16-1-2025-supplement-title-page.pdf](#)
- [Captions Supp Figures.pdf](#)
- [Fig. S1a.pdf](#)
- [Fig. S1b.pdf](#)
- [Fig. S2.pdf](#)
- [Fig. S3.pdf](#)
- [Fig. S4.pdf](#)
- [Fig. S5.pdf](#)
- [Fig. S6.pdf](#)
- [Fig. S7.pdf](#)
- [Fig. S8.pdf](#)
- [Fig. S9.pdf](#)
- [Table S1 - Sillimanite.pdf](#)
- [Table S10 - Corundum.pdf](#)
- [Table S2 - Garnet.pdf](#)
- [Table S3 - Osumilite.pdf](#)
- [Table S4 - Opx.pdf](#)
- [Table S5 - Spinel.pdf](#)
- [Table S6 - Rutile.pdf](#)

- Table S7 - Oxydes.pdf
- Table S8 - Glass.pdf
- Table S9 - Feldspars.pdf
- captions Supp Tables.pdf

The copyright of individual parts of the supplement might differ from the article licence.
