# Supplementary figures and images for: Post-Hercynian ultrahigh-temperature tectono-metamorphic evolution of the Middle Atlas lower crust (central Morocco) revealed by metapelitic granulite xenoliths
Source: Copernicus journal article supplement (doi:10.5194/se-16-1-2025), 2025-01-03

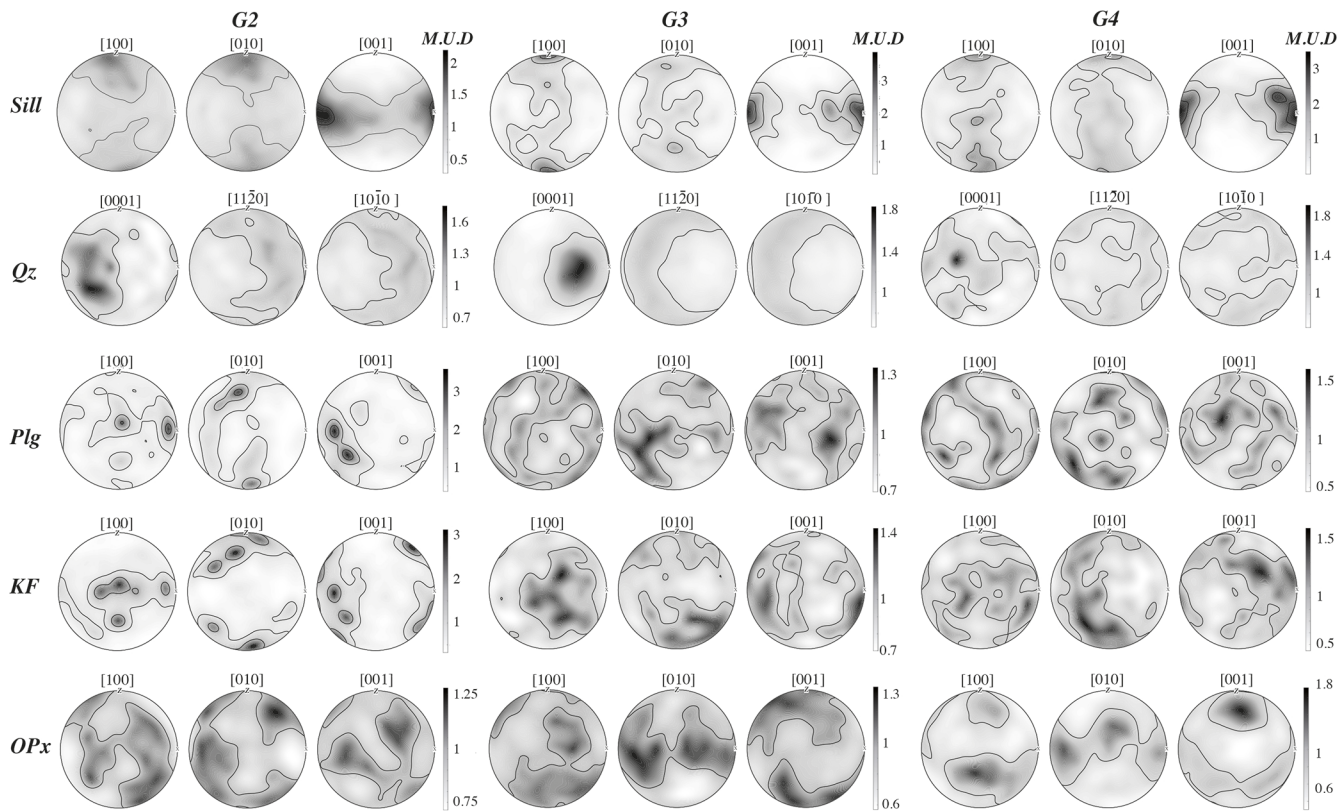

Supplement: Supplementary file 9 [file se-16-1-2025-supplement.zip]

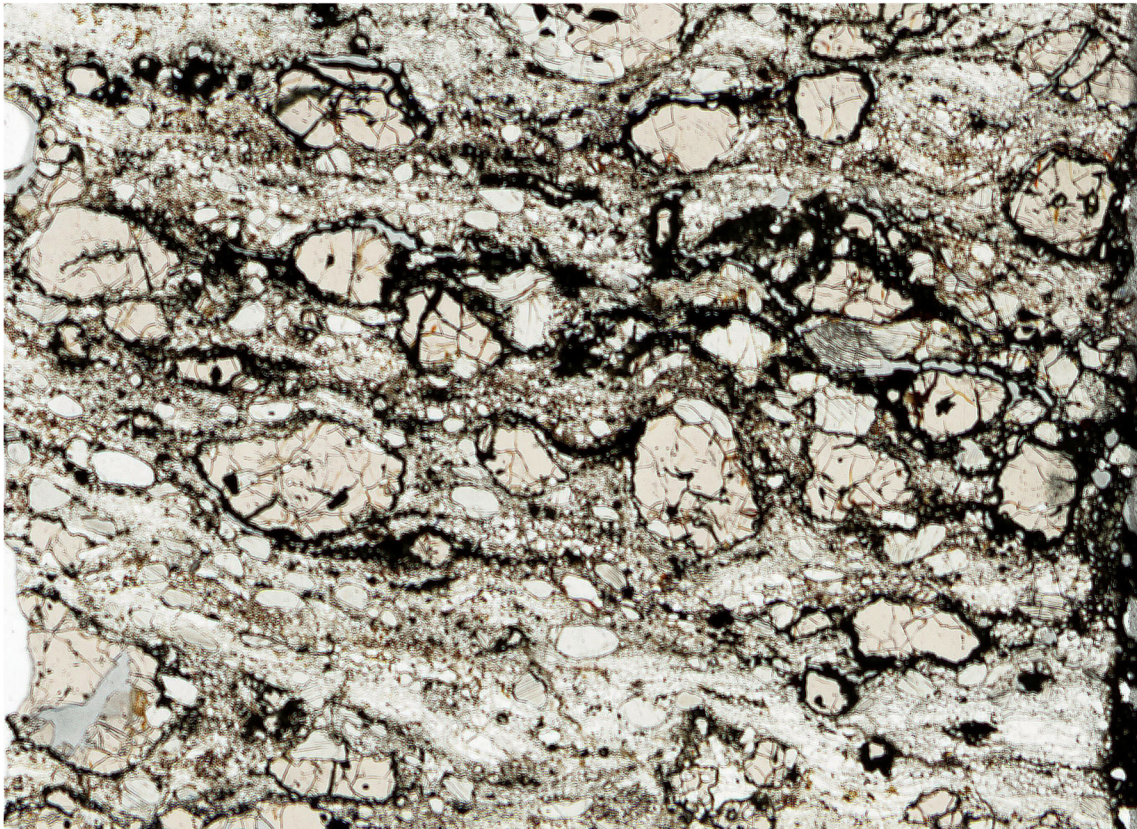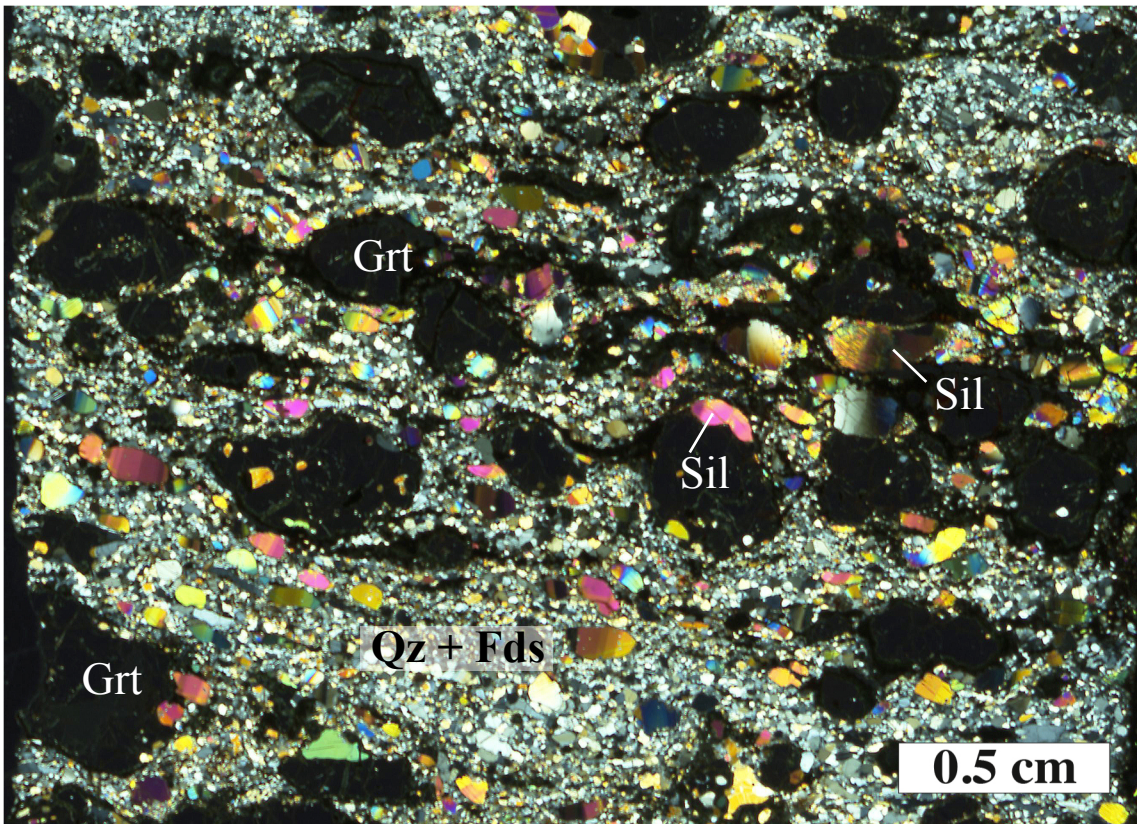

**Fig. S1a - G3**

Supplement: Supplementary file 14 [file se-16-1-2025-supplement.zip]

*Sill***TAF 501****TAF 500***M.U.D**M.U.D*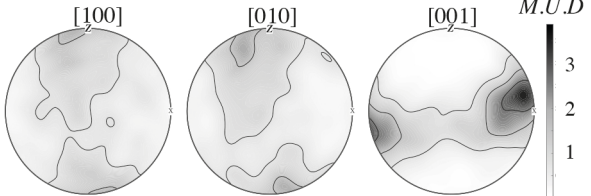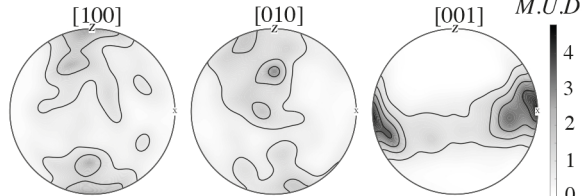*Gt*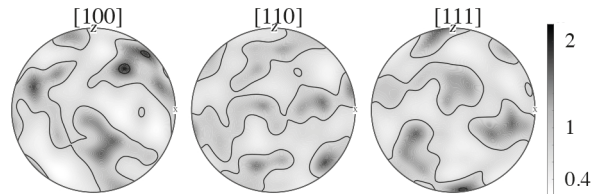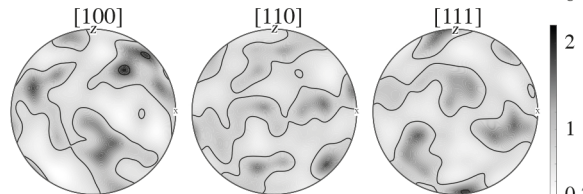*OPx*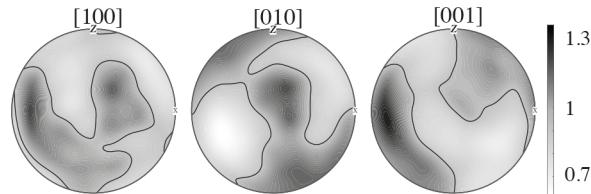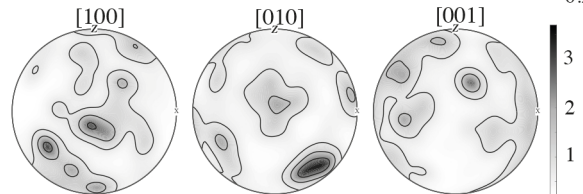

Supplement: Supplementary file 18 [file se-16-1-2025-supplement.zip]

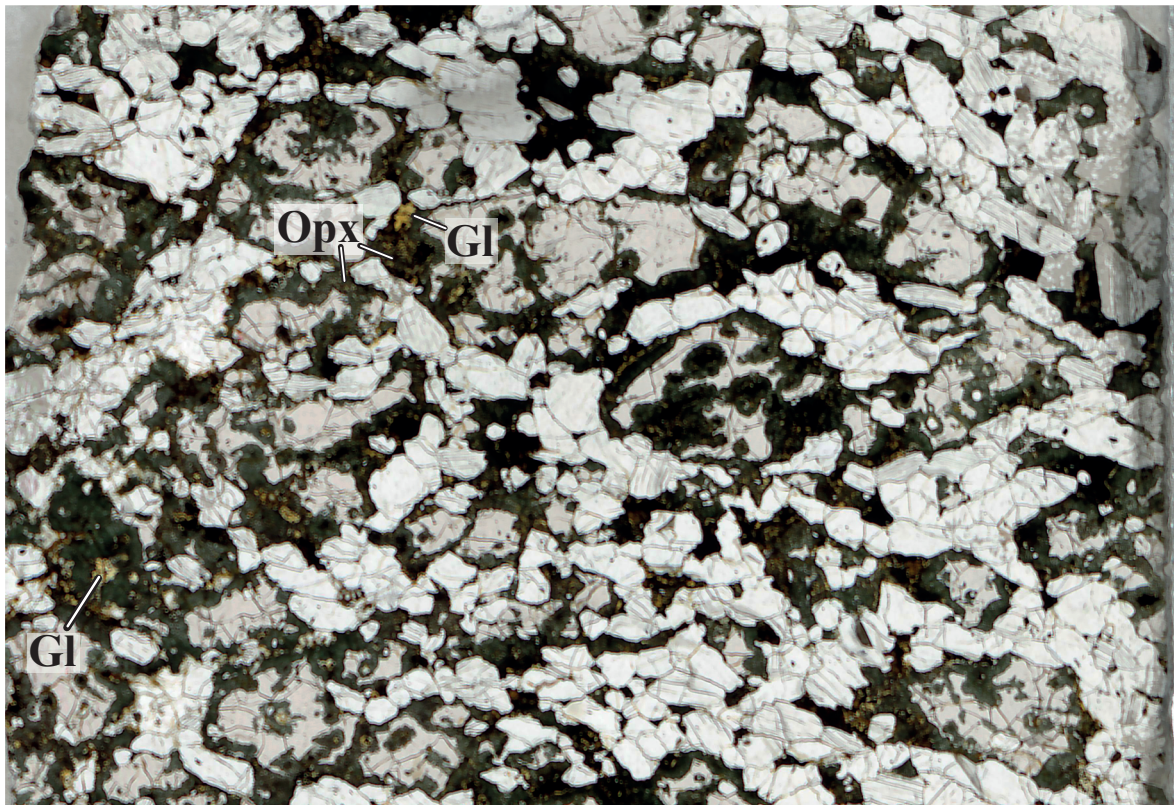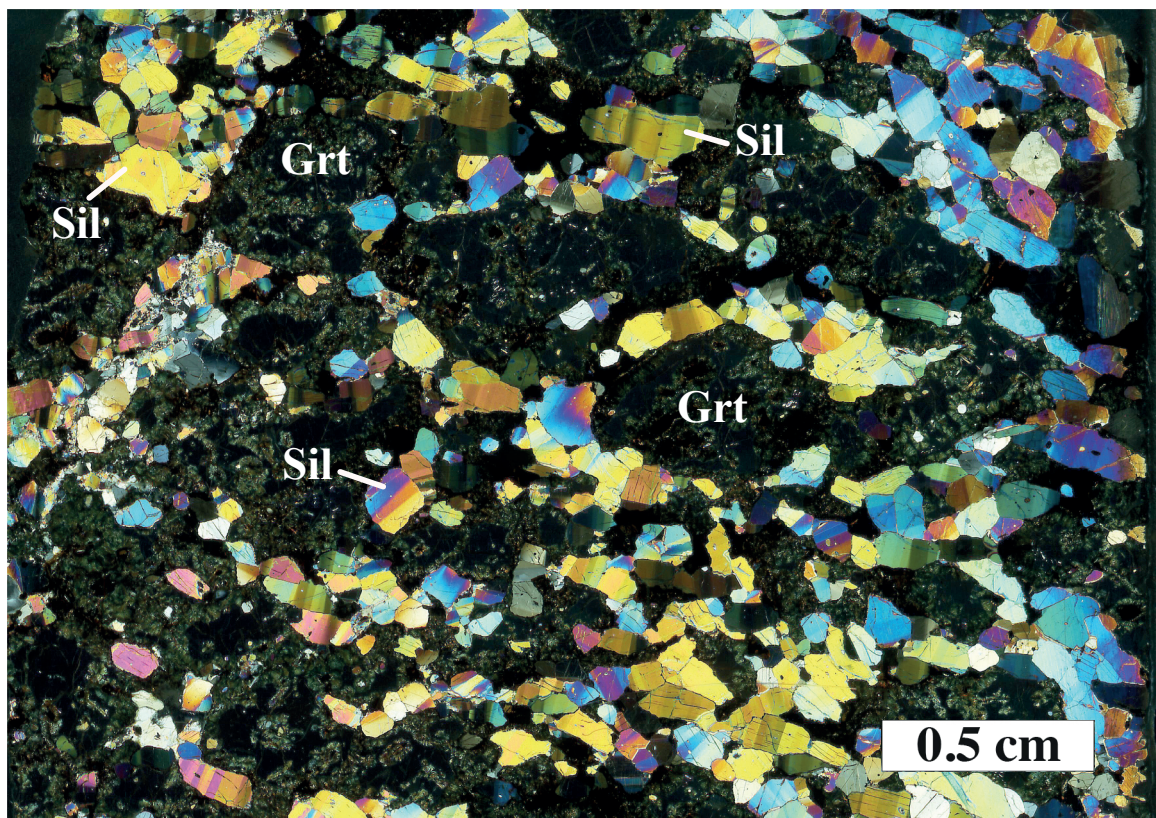

**Fig. S1b - TAF500**

Supplement: Supplementary file 19 [file se-16-1-2025-supplement.zip]
